# Supplementary material
Source: Royal Society of Chemistry journal article supplement (doi:10.1039/d5nr04950d)
Supplement: d5nr04950d1.xlsx [file d5nr04950d1.xlsx]

## Sheet: MOF-5
Time	Current
s	µA
0	0.0549244
0.0758245	11.9879
0.0863469	1.91504
0.096867	-0.582909
0.107387	22.903
0.128436	20.9494
0.138956	11.0249
0.149476	-5.07652
0.159996	1.10473
0.170517	-2.22638
0.191567	-0.991574
0.202089	-1.81534
0.21261	10.9863
0.223132	1.08853
0.233651	7.67852
0.254701	2.77281
0.265221	-3.33754
0.275742	-5.94547
0.286264	0.0678472
0.296785	-5.41272
0.317834	-2.68434
0.328356	-3.62434
0.338877	-1.50713
0.349397	0.239183
0.359917	-6.01257
0.380966	11.0285
0.391486	20.5356
0.402007	25.893
0.412528	11.3288
0.423048	-0.941836
0.444097	-0.219349
0.454617	-1.62096
0.465137	-4.17276
0.475659	-1.9707
0.48618	3.93505
0.507229	1.55416
0.517749	-0.947433
0.528271	3.96942
0.538792	2.11952
0.549314	-2.03147
0.570363	4.33258
0.580885	-0.168551
0.591405	-0.206833
0.601926	-0.874556
0.612447	0.276162
0.633496	-1.30695
0.644017	-0.251598
0.654539	-3.25705
0.665061	-1.12211
0.67558	6.84852
0.696629	-0.208991
0.707152	-0.716698
0.717672	20.6107
0.728194	25.1505
0.738716	20.6794
0.759765	11.3899
0.770286	2.75759
0.780805	0.810323
0.791327	0.366228
0.801847	4.66672
0.822895	-2.03535
0.833416	0.248486
0.843938	-1.56174
0.854458	4.4754
0.864979	-5.86144
0.886029	-2.01244
0.896548	-1.58906
0.90707	1.99261
0.917591	1.82065
0.928113	4.18977
0.94916	-4.72683
0.959681	2.25368
0.970202	11.1313
0.980723	22.0251
0.991245	25.6443
1.01229	9.24883
1.02281	-0.982623
1.03333	-1.10683
1.04385	-0.751338
1.05437	4.57516
1.07542	-1.28536
1.08594	11.1001
1.09646	25.0829
1.10699	23.6614
1.11751	11.4196
1.13856	-3.34555
1.14908	-0.034599
1.1596	-1.33208
1.17012	3.50189
1.18064	-1.86329
1.20169	1.471
1.21221	1.07173
1.22273	0.316559
1.23325	-2.7942
1.24377	-0.0878433
1.26482	2.088
1.27535	-4.03668
1.28587	-1.37422
1.29639	-4.70938
1.30691	-3.87249
1.32796	-0.914345
1.33848	9.30953
1.349	3.18588
1.35952	2.65583
1.37004	9.51434
1.39109	24.5167
1.40161	30.765
1.41213	1.48052
1.42265	-0.529748
1.43317	-0.618409
1.45422	2.1095
1.46474	1.56128
1.47526	-3.10413
1.48579	-0.237782
1.49631	0.105967
1.51736	-3.16662
1.52788	0.780298
1.5384	-2.57645
1.54892	2.91912
1.55944	0.578817
1.58049	0.268188
1.59101	10.2372
1.60153	23.6678
1.61205	18.0248
1.62257	8.61439
1.64362	1.08961
1.65414	2.58073
1.66466	0.35842
1.67518	-1.92634
1.68571	6.00726
1.70676	2.28907
1.71728	-3.60147
1.7278	0.223772
1.73832	1.7318
1.74884	-0.566913
1.76989	2.05078
1.78041	-0.199752
1.79093	-0.822571
1.80145	-0.480081
1.81197	-2.92839
1.83302	3.29906
1.84354	10.3817
1.85406	23.8703
1.86458	21.6418
1.87511	10.1319
1.89616	-3.83701
1.90668	3.77498
1.9172	-0.462725
1.92772	2.90067
1.93824	-2.38631
1.95929	1.94265
1.96981	-5.98324
1.98033	-1.3909
1.99085	-0.292153
2.00137	3.77482
2.02242	2.07028
2.03295	-1.17879
2.04346	-0.68241
2.05398	-0.663767
2.0645	0.329112
2.08555	-3.16545
2.09607	13.025
2.10659	28.2501
2.11712	19.6576
2.12764	11.3858
2.14869	-1.89806
2.15921	-5.28835
2.16973	2.20699
2.18025	-0.0704022
2.19077	0.21454
2.21182	-5.25919
2.22234	-2.98383
2.23286	1.38414
2.24338	6.0526
2.2539	-0.775111
2.27495	-0.609238
2.28547	-3.13793
2.29599	-1.52284
2.30651	0.875917
2.31703	-0.101473
2.33808	-1.32476
2.3486	10.4866
2.35912	25.9162
2.36964	23.1175
2.38017	11.5572
2.40122	0.0667314
2.41174	3.53306
2.42226	2.04358
2.43278	1.14895
2.4433	-4.69241
2.46435	0.125246
2.47487	4.44187
2.48539	2.88167
2.49591	-2.8291
2.50643	-2.56869
2.52748	-1.51403
2.538	0.877682
2.54852	-0.616551
2.55904	0.644006
2.56956	0.891109
2.59061	-3.74352
2.60113	-0.120642
2.61165	0.620398
2.62217	-0.252161
2.6327	14.5998
2.65374	17.6547
2.66426	25.5073
2.67479	26.6475
2.68531	2.45312
2.69583	-3.04809
2.71688	-0.0372534
2.7274	2.5217
2.73792	-4.93633
2.74844	-6.33628
2.75896	0.778676
2.78001	0.133291
2.79053	-0.738147
2.80105	0.11572
2.81157	-2.58413
2.82209	-4.54503
2.84314	-0.500465
2.85366	-2.34027
2.86419	-3.51517
2.87471	-0.168451
2.88523	9.09397
2.90628	19.0886
2.9168	25.5426
2.92732	11.8276
2.93784	-3.00013
2.94836	-2.66259
2.96941	0.586811
2.97993	-2.35128
2.99045	1.06927
3.00097	1.02029
3.01149	6.08156
3.03254	-1.01846
3.04307	1.63121
3.05359	-0.268733
3.06411	-1.04114
3.07463	-4.32193
3.09568	-1.38196
3.1062	2.46544
3.11672	-1.06479
3.12724	-0.643255
3.13776	11.139
3.15881	14.2438
3.16933	23.7763
3.17985	24.2674
3.19037	-2.0783
3.20089	-5.9123
3.22195	-9.76408
3.23247	-1.59194
3.24299	4.00468
3.25351	0.141501
3.26403	-3.52116
3.28508	-2.82492
3.2956	3.39523
3.30612	0.473353
3.31664	0.144142
3.32716	-0.160546
3.34821	0.115316
3.35873	14.4306
3.36925	25.6834
3.37977	24.6718
3.39029	8.88028
3.41134	1.53486
3.42186	-2.0548
3.43238	3.28482
3.4429	-0.0725033
3.45342	2.00715
3.47447	-1.02063
3.48499	4.15954
3.49551	-0.0162149
3.50603	1.7519
3.51655	-3.87656
3.5376	2.31748
3.54812	1.13717
3.55864	-7.84853
3.56916	0.751946
3.57969	-0.184216
3.60074	0.249902
3.61126	8.77815
3.62178	23.2152
3.6323	23.4887
3.64282	15.5799
3.66387	1.00429
3.67439	-0.0166818
3.68491	4.5915
3.69543	2.1095
3.70595	1.56128
3.727	-5.10413
3.73752	-0.237782
3.74804	0.105967
3.75856	-3.16662
3.76908	0.780298
3.79014	0.163074
3.80066	4.54003
3.81118	13.6807
3.8217	23.8485
3.83222	22.2841
3.85327	10.1051
3.86379	0.330777
3.87431	0.647114
3.88483	-0.756777
3.89535	-0.611413
3.9164	4.81293
3.92692	1.52158
3.93744	0.202855
3.94796	-1.03959
3.95848	-3.33049
3.97953	-0.200785
3.99005	2.6236
4.00057	-1.17879
4.01109	-0.68241
4.02161	-0.663767
4.04266	0.329112
4.05318	-2.31411
4.06371	13.7449
4.07423	10.2055
4.08475	23.0823
4.1058	28.6019
4.11632	-4.78382
4.12684	-0.706902
4.13736	-2.56575
4.14788	2.65641
4.16893	0.574872
4.17945	-0.00609318
4.18997	-2.98383
4.20049	1.38414
4.21101	6.0526
4.23206	-0.775111
4.24258	-0.609238
4.2531	-3.13793
4.26362	0.958224
4.27414	-3.74467
4.29519	-3.32412
4.30571	3.84284
4.31624	-2.71908
4.32676	3.24732
4.33728	4.57765
4.35833	0.778758
4.36885	10.2312
4.37937	13.6738
4.38989	23.4332
4.40041	29.8866
4.42146	-4.06376
4.43198	0.125246
4.4425	4.44187
4.45303	2.88167
4.46355	-2.8291
4.4846	-2.56869
4.49512	-1.51403
4.50564	0.0776819
4.51616	-0.916551
4.52668	1.64401
4.54773	0.891109
4.55825	-1.89722
4.56878	6.94859
4.5793	17.6303
4.58982	25.8017
4.61087	24.1916
4.62139	-0.120642
4.63191	0.620398
4.64243	-0.252161
4.65295	1.51207
4.674	1.16504
4.68452	-5.84588
4.69504	-4.23133
4.70556	2.56648
4.71609	2.12083
4.73713	-0.450267
4.74765	-5.13517
4.75817	-1.11516
4.76869	-2.03825
4.77922	1.91243
4.80026	-3.51517
4.81079	-0.168451
4.82131	-0.53091
4.83183	6.77997
4.84235	0.651443
4.8634	-2.34027
4.87392	3.19114
4.88444	8.554
4.89496	15.3517
4.90548	20.5678
4.92653	24.3734
4.93705	3.25751
4.94757	-1.42357
4.95809	-1.1676
4.96861	-1.01846
4.98966	-0.396605
5.00018	1.54511
5.0107	-3.90305
5.02122	-4.33593
5.03174	2.38533
5.05279	-0.57428
5.06331	0.649924
5.07384	3.00814
5.08436	-5.2046
5.09488	-2.35474
5.11593	0.526531
5.12645	13.1895
5.13697	22.8917
5.14749	27.1147
5.15801	12.6438
5.17906	-3.64379
5.18958	-2.79509
5.2001	1.79588
5.21062	4.03406
5.22114	-1.15225
5.24219	-0.888007
5.25271	-3.38275
5.26323	-5.70289
5.27376	2.41883
5.28428	1.39289
5.30533	4.03406
5.31585	7.61841
5.32637	-0.52689
5.33689	0.492016
5.34741	6.99294
5.36846	22.8743
5.37898	26.9782
5.3895	8.25302
5.40002	-1.94382
5.41054	3.76737
5.43159	1.2199
5.44211	1.01273
5.45263	-3.13499
5.46316	-1.5063
5.47368	-1.37858
5.49473	-0.148707
5.50525	-1.61004
5.51577	-2.48435
5.52629	-0.914678
5.53681	-3.08375
5.55786	-3.87245
5.56838	-0.144674
5.5789	2.65127
5.58942	-4.59271
5.59994	9.07764
5.62099	16.5114
5.63151	22.468
5.64203	26.5869
5.65255	0.010535
5.66307	-1.95182
5.68412	-2.34186
5.69464	1.16067
5.70516	-0.682532
5.71568	-2.26433
5.7262	1.76479
5.74725	-0.465413
5.75777	1.81144
5.76829	-0.142017
5.77881	-3.26071
5.78933	-0.306514
5.81039	0.156022
5.82091	2.87827
5.83143	-2.72153
5.84195	-0.118108
5.85247	-5.17081
5.87352	1.95644
5.88404	8.76432
5.89456	18.5995
5.90508	23.8462
5.9156	15.3324
5.93665	-4.57792
5.94717	-3.26737
5.9577	-2.23206
5.96822	-3.64006
5.97874	-5.51186
5.99978	5.5892
6.0103	-0.961739
6.02082	0.732533
6.03135	-2.16671
6.04186	1.75167
6.06291	-2.26881
6.07343	1.29964
6.08395	-2.91707
6.09447	-5.39188
6.105	1.13942
6.12604	11.9188
6.13657	24.5044
6.14709	24.1732
6.15761	17.7424
6.16813	8.42453
6.18918	-3.1199
6.1997	-4.67706
6.21022	-3.03892
6.22074	-4.00814
6.23126	2.24313
6.25231	2.4636
6.26283	-2.88683
6.27335	-4.17548
6.28387	-1.06546
6.29439	4.17755
6.31544	-8.46718
6.32596	1.58146
6.33648	-3.2305
6.347	3.12423
6.35752	-3.23701
6.37857	-0.857105
6.3891	-1.20621
6.39962	-2.61313
6.41014	7.48865
6.42066	14.4762
6.44171	21.0893
6.45223	28.1857
6.46275	-5.68711
6.47327	-1.18215
6.48379	-0.0928026
6.50484	-0.252415
6.51536	-0.281657
6.52588	-3.3688
6.5364	-0.199021
6.54692	-0.116136
6.56797	3.87556
6.5785	-2.30122
6.58901	-0.195142
6.59954	-1.82469
6.61006	4.78248
6.63111	13.8322
6.64163	23.8479
6.65215	20.891
6.66267	5.60581
6.67319	-0.411378
6.69424	-0.312059
6.70476	0.750776
6.71528	-0.549369
6.72581	-2.18395
6.73633	-2.84673
6.75738	-0.712541
6.7679	-1.64793
6.77842	0.702406
6.78894	-0.0133084
6.79946	-4.09101
6.82051	0.201565
6.83103	-4.03261
6.84155	-1.85128
6.85207	-0.883945
6.86259	-6.23205
6.88364	10.8901
6.89416	12.4654
6.90469	23.5495
6.91521	22.7498
6.92573	0.274797
6.94678	-2.93255
6.9573	-0.809911
6.96782	-1.65949
6.97834	0.275332
6.98886	-3.61602
7.00991	1.38274
7.02043	0.729842
7.03095	0.85098
7.04148	1.15109
7.052	-1.9629
7.07305	-0.425114
7.08357	-1.31893
7.09409	1.65868
7.10461	-4.9988
7.11513	6.23285
7.13618	12.6328
7.1467	25.9371
7.15722	25.3172
7.16775	0.707477
7.17827	0.430087
7.19932	-4.54751
7.20984	1.61528
7.22036	3.51192
7.23088	3.03205
7.2414	0.702336
7.26245	-4.67771
7.27297	2.83046
7.28349	-0.442206
7.29401	-7.60516
7.30453	3.8216
7.32558	-0.11365
7.3361	0.813789
7.34662	-3.89321
7.35714	-1.90678
7.36766	1.13275
7.38871	-4.481
7.39923	17.2612
7.40975	28.8109
7.42027	23.7137
7.43079	11.2867
7.45184	-3.7864
7.46236	-2.31942
7.47289	-0.168398
7.48341	2.19592
7.49393	1.75419
7.51498	3.21605
7.5255	0.331046
7.53602	2.98739
7.54654	1.19225
7.55706	-0.929137
7.57811	-2.08546
7.58863	1.27735
7.59915	-3.0108
7.60967	-4.9233
7.62019	1.08766
7.64124	6.91386
7.65176	13.7558
7.66228	23.8584
7.6728	24.9502
7.68333	-0.929137
7.70437	-0.0964385
7.7149	-1.80137
7.72542	-2.59523
7.73594	-6.77182
7.74646	-1.00563
7.76751	2.69461
7.77803	1.14414
7.78855	-0.804644
7.79908	-0.0446726
7.8096	2.27267
7.83065	-8.28954
7.84117	-0.120685
7.85169	3.40855
7.86221	5.1073
7.87273	24.9309
7.89378	26.3872
7.9043	12.9506
7.91482	10.3924
7.92534	1.63123
7.93587	2.04843
7.95691	-0.373984
7.96744	2.72144
7.97796	5.87821
7.98848	-0.47828
7.999	-0.145347
8.02005	0.596037
8.03057	4.03364
8.04109	-0.0910309
8.05161	4.41249
8.06213	-2.90287
8.08318	-0.558668
8.0937	3.13892
8.10422	-4.53287
8.11474	1.7481
8.12526	15.1306
8.14631	22.046
8.15683	19.4522
8.16736	13.0236
8.17788	-0.595091
8.1884	2.36188
8.20945	-1.42776
8.21997	3.08991
8.23049	-0.720601
8.24101	1.48339
8.25153	1.48101
8.27258	0.614604
8.2831	-2.10911
8.29362	3.2926
8.30414	-2.73773
8.31466	-2.56497
8.33571	2.02838
8.34624	0.781044
8.35675	-2.77169
8.36728	0.218816
8.3778	-1.05489
8.39885	2.75025
8.40937	10.1125
8.41989	22.7052
8.43041	27.6614
8.44093	18.7345
8.46198	6.00303
8.4725	0.189859
8.48302	0.350978
8.49354	1.35591
8.50406	0.657221
8.52511	-2.27741
8.53564	-0.373678
8.54616	-4.94364
8.55668	-2.93198
8.5672	4.60498
8.58825	1.99829
8.59877	-4.3145
8.60929	-2.48994
8.61981	-0.424466
8.63033	0.638314
8.65138	1.85928
8.6619	3.3987
8.67242	-0.081331
8.68294	-2.22014
8.69346	10.9258
8.71451	21.3512
8.72503	25.5217
8.73555	11.0063
8.74608	-3.07632
8.7566	-1.05817
8.77765	-0.665851
8.78817	2.10366
8.79869	-4.7917
8.80921	-3.11473
8.81973	-1.13546
8.84078	7.60452
8.8513	2.86991
8.86182	-0.33469
8.87234	2.13814
8.88287	6.17849
8.90392	-0.701934
8.91444	10.9117
8.92496	27.6635
8.93548	20.508
8.946	23.028
8.96705	-1.52619
8.97757	5.77839
8.98809	5.13391
8.99861	1.69954
9.00913	2.05492
9.03018	-6.08787
9.0407	-1.9629
9.05122	11.2329
9.06174	25.9371
9.07226	25.3172
9.09331	12.6328
9.10383	-4.54751
9.11435	1.61528
9.12487	3.51192
9.13539	3.03205
9.15644	0.702336
9.16696	-4.67771
9.17749	2.83046
9.18801	-0.442206
9.19853	-7.60516
9.21958	1.13275
9.2301	-4.481
9.24062	-3.89321
9.25114	-1.90678
9.26166	3.8216
9.28271	-1.11365
9.29324	0.813789
9.30376	17.2612
9.31428	28.8109
9.3248	23.7137
9.34585	11.2867
9.35637	-3.7864
9.36689	-2.08546
9.37741	1.27735
9.38793	1.18838
9.40898	0.331046
9.4195	2.98739
9.43002	-2.31942
9.44055	-0.168398
9.45107	2.19592
9.47212	1.75419
9.48264	3.21605
9.49316	1.19225
9.50368	-0.929137
9.5142	1.08766
9.53525	-3.0108
9.54577	-4.9233
9.55629	13.7558
9.56681	23.8584
9.57733	24.9502
9.59838	6.91386
9.6089	-1.09644
9.61942	-1.80137
9.62994	-2.59523
9.64046	-6.77182
9.66151	-1.00563
9.67203	2.69461
9.68256	1.14414
9.69308	-1.80464
9.7036	-0.0446726
9.72465	2.27267
9.73517	-8.28954
9.74569	-0.373984
9.75621	1.63123
9.76673	2.04843
9.78778	5.1073
9.7983	3.40855
9.80882	12.8906
9.81934	24.9309
9.82986	26.8373
9.85091	10.9924
9.86143	-0.120775
9.87195	2.73144
9.88248	4.90822
9.893	-0.55828
9.91405	-0.185848
9.92457	2.3531
9.93509	2.36333
9.94561	-2.77684
9.95613	-4.57523
9.97718	-1.16525
9.9877	3.15924
9.99822	-7.43982
10.0087	2.58653
10.0193	1.11578
10.0403	0.936936
10.0508	4.76546
10.0614	-0.599564
10.0719	-4.6046
10.0824	-2.27056
10.1034	-2.76091
10.114	-3.65713
10.1245	1.30741
10.135	-1.93763
10.1455	-5.93806
10.1666	2.09286
10.1771	11.6774
10.1876	25.0956
10.1981	24.3415
10.2087	13.9089
10.2297	0.11417
10.2402	3.71232
10.2507	1.27622
10.2613	1.17738
10.2718	1.23083
10.2928	-4.37429
10.3034	-0.494402
10.3139	-0.778728
10.3244	0.623263
10.3349	-4.08016
10.356	4.90725
10.3665	0.313479
10.377	-3.63759
10.3875	-5.13179
10.3981	-0.844707
10.4191	-0.269296
10.4296	9.85498
10.4402	24.3006
10.4507	22.0986
10.4612	13.6686
10.4822	-2.1758
10.4928	-0.115616
10.5033	2.93946
10.5138	7.72273
10.5243	-3.02596
10.5454	-1.39492
10.5559	-2.52203
10.5664	2.35534
10.5769	-3.44775
10.5875	-1.45453
10.6085	-0.0888927
10.619	-2.93897
10.6295	-2.87485
10.6401	-1.4283
10.6506	-6.30763
10.6716	-4.34078
10.6822	10.7717
10.6927	24.4692
10.7032	23.4662
10.7137	6.68478
10.7348	-1.39275
10.7453	2.39771
10.7558	1.66927
10.7663	-0.23648
10.7769	-2.66477
10.7979	1.89554
10.8084	-1.73853
10.8189	-3.51126
10.8295	-2.40897
10.84	4.34939
10.861	0.661201
10.8716	3.48122
10.8821	-1.43945
10.8926	2.81727
10.9031	-1.80632
10.9242	-0.472755
10.9347	19.4785
10.9452	26.3278
10.9557	22.519
10.9663	11.7573
10.9873	0.97965
10.9978	3.63501
11.0083	-1.46887
11.0189	-5.22919
11.0294	-0.839765
11.0504	0.0462026
11.061	0.328943
11.0715	3.95402
11.082	0.951012
11.0925	2.44119
11.1136	-3.30665
11.1241	2.60631
11.1346	6.29495
11.1451	2.32105
11.1557	0.761429
11.1767	0.462427
11.1872	17.3788
11.1978	21.2397
11.2083	23.6904
11.2188	13.394
11.2398	2.23424
11.2504	-1.3133
11.2609	0.922887
11.2714	-0.834599
11.2819	0.361775
11.303	-0.396671
11.3135	-3.42821
11.324	-0.0634042
11.3345	2.63409
11.3451	-2.90396
11.3661	-0.723999
11.3766	1.99634
11.3872	-3.21281
11.3977	0.548463
11.4082	-3.18357
11.4292	3.4073
11.4398	18.9574
11.4503	30.0969
11.4608	23.3658
11.4713	14.2348
11.4924	0.363357
11.5029	0.306624
11.5134	4.64792
11.5239	-3.9615
11.5345	3.16905
11.5555	-0.147075
11.566	4.22985
11.5765	0.562262
11.5871	-2.02004
11.5976	0.832253
11.6186	2.21011
11.6292	0.107398
11.6397	1.46558
11.6502	-1.56659
11.6607	-6.40806
11.6818	2.70277
11.6923	14.1116
11.7028	24.469
11.7133	24.2295
11.7239	15.124
11.7449	-1.37269
11.7554	-2.12172
11.7659	-0.566216
11.7765	3.57086
11.787	-4.1655
11.808	3.57907
11.8186	-1.91968
11.8291	-3.30554
11.8396	3.78397
11.8501	-0.290961
11.8712	-3.90461
11.8817	-1.07728
11.8922	2.79595
11.9027	3.5798
11.9133	-1.28258
11.9343	1.22018
11.9448	14.1564
11.9553	22.0882
11.9659	25.0902
11.9764	11.9163
11.9974	-1.60968
12.008	-1.47792
12.0185	0.201305
12.029	0.0896501
12.0395	-1.69817
12.0606	-1.27911
12.0711	3.34336
12.0816	0.642124
12.0921	2.65794
12.1027	3.60908
12.1237	1.7683
12.1342	6.81948
12.1447	-2.47839
12.1553	2.42766
12.1658	-0.955387
12.1868	5.57292
12.1974	17.1184
12.2079	18.1555
12.2184	21.1145
12.2289	14.0069
12.25	2.37197
12.2605	2.2119
12.271	-0.212809
12.2815	1.36673
12.2921	1.96103
12.3131	-0.233848
12.3236	3.08499
12.3341	-6.78528
12.3447	1.90328
12.3552	-3.10526
12.3762	2.87891
12.3868	-0.68674
12.3973	-2.66903
12.4078	1.12283
12.4183	-2.73674
12.4394	-2.74104
12.4499	7.30542
12.4604	23.9438
12.4709	25.516
12.4814	15.0842
12.5025	-0.425609
12.513	3.14671
12.5235	0.0539369
12.5341	-0.280146
12.5446	1.72241
12.5656	3.17836
12.5762	-1.02533
12.5867	-0.732017
12.5972	-0.482977
12.6077	0.248556
12.6288	-2.70393
12.6393	3.08711
12.6498	-1.20243
12.6603	1.38872
12.6708	-2.4789
12.6919	-0.595266
12.7024	9.35786
12.7129	30.331
12.7235	25.5186
12.734	7.30117
12.755	1.64013
12.7655	-1.19742
12.7761	5.75611
12.7866	-3.16125
12.7971	-6.74784
12.8182	0.197805
12.8287	-1.04513
12.8392	-1.25101
12.8497	-6.43015
12.8602	1.28171
12.8813	5.02506
12.8918	-5.73288
12.9023	3.51719
12.9129	-1.70786
12.9234	7.05407
12.9444	1.30933
12.955	11.4479
12.9655	27.3435
12.976	25.6037
12.9865	10.2329
13.0076	2.13278
13.0181	-1.53362
13.0286	-5.37083
13.0391	6.10088
13.0496	-1.0498
13.0707	-1.82887
13.0812	1.01718
13.0917	-4.68358
13.1023	-4.0648
13.1128	-1.50044
13.1338	-1.56073
13.1444	0.215884
13.1549	3.37104
13.1654	-1.4235
13.1759	1.47988
13.197	1.80644
13.2075	8.75653
13.218	24.7101
13.2285	21.1932
13.239	15.2069
13.2601	1.36664
13.2706	0.0495619
13.2811	-4.02312
13.2917	0.348318
13.3022	-2.30339
13.3232	2.12001
13.3338	-0.358338
13.3443	-2.43947
13.3548	2.77933
13.3653	2.16677
13.3864	-1.78167
13.3969	3.48957
13.4074	-0.89608
13.4179	-0.928383
13.4285	0.371775
13.4495	-2.26016
13.46	10.6858
13.4705	23.5421
13.4811	28.6195
13.4916	16.5155
13.5126	-0.777388
13.5232	4.83615
13.5337	-0.12999
13.5442	1.14288
13.5547	2.65339
13.5758	0.87702
13.5863	7.2528
13.5968	0.73077
13.6073	-3.59636
13.6178	3.92033
13.6389	-1.23743
13.6494	-0.913779
13.6599	-8.984
13.6705	3.00596
13.681	2.45781
13.702	2.39946
13.7126	14.9502
13.7231	29.1021
13.7336	23.8859
13.7441	14.8277
13.7652	-2.23375
13.7757	-1.06247
13.7862	3.17345
13.7967	1.17455
13.8072	-4.00425
13.8283	1.08507
13.8388	-0.549284
13.8493	-2.45846
13.8599	1.30417
13.8704	-1.21473
13.8914	-4.71619
13.9019	-3.3368
13.9125	5.31282
13.923	-4.54934
13.9335	0.669076
13.9546	1.832
13.9651	13.9315
13.9756	20.3439
13.9861	23.0584
13.9966	12.435
14.0177	2.40303
14.0282	-1.93682
14.0387	-3.49392
14.0493	3.01073
14.0598	3.31878
14.0808	1.11133
14.0913	-1.82819
14.1019	1.22151
14.1124	0.32826
14.1229	2.5154
14.144	-3.75109
14.1545	0.349131
14.165	-0.477669
14.1755	-3.33238
14.186	0.647592
14.2071	0.104858
14.2176	10.7797
14.2281	25.2133
14.2387	19.7634
14.2492	11.8509
14.2702	1.29554
14.2807	0.852906
14.2913	3.23252
14.3018	-3.60694
14.3123	-4.52817
14.3334	0.717921
14.3439	1.36682
14.3544	6.36584
14.3649	1.85169
14.3754	-2.62447
14.3965	2.42051
14.407	-2.53943
14.4175	-4.46197
14.4281	7.83514
14.4386	0.978455
14.4596	2.147
14.4701	13.7044
14.4807	29.4657
14.4912	24.8772
14.5017	15.6688
14.5228	-3.08494
14.5333	-4.18066
14.5438	4.28395
14.5543	4.42901
14.5648	1.53371
14.5859	0.678878
14.5964	0.499029
14.6069	-2.06655
14.6175	4.62053
14.628	1.97862
14.649	1.51924
14.6595	1.12951
14.6701	3.14689
14.6806	1.51653
14.6911	2.23832
14.7122	-3.5103
14.7227	13.5436
14.7332	30.5922
14.7437	22.4669
14.7542	11.6251
14.7753	2.67851
14.7858	2.87478
14.7963	1.87516
14.8069	-4.85766
14.8174	1.5067
14.8384	-3.55458
14.8489	-2.47658
14.8595	1.64581
14.87	-0.888361
14.8805	2.4313
14.9016	9.45387
14.9121	2.33387
14.9226	2.17073
14.9331	-2.68987
14.9436	-1.93082
14.9647	-3.19418
14.9752	10.4126
14.9857	20.7455
14.9963	22.043
15.0068	11.3852
15.0278	-3.00473
15.0383	-4.26155
15.0489	-4.08848
15.0594	1.36313
15.0699	0.179419
15.091	3.0809
15.1015	3.13645
15.112	-1.02294
15.1225	2.01214
15.133	-4.32589
15.1541	6.85593
15.1646	3.5898
15.1751	-0.645746
15.1857	-3.49309
15.1962	1.14129
15.2172	-5.61584
15.2277	9.67176
15.2383	26.2725
15.2488	24.2506
15.2593	10.5376
15.2804	2.85507
15.2909	-3.11902
15.3014	0.854957
15.3119	-1.49515
15.3224	-2.54466
15.3435	1.39158
15.354	-2.98162
15.3645	5.71173
15.375	-1.75591
15.3856	5.97544
15.4066	-3.2852
15.4171	1.81967
15.4277	-3.60233
15.4382	-4.02738
15.4487	0.479596
15.4698	2.03471
15.4803	8.1854
15.4908	27.58
15.5013	21.6288
15.5118	12.4061
15.5329	1.14048
15.5434	1.78583
15.5539	-5.39884
15.5645	4.86055
15.575	1.68707
15.596	-1.27806
15.6065	-3.07554
15.6171	-5.0873
15.6276	-4.08836
15.6381	1.63645
15.6592	-1.02424
15.6697	-3.39795
15.6802	-1.58239
15.6907	4.69703
15.7012	-0.993018
15.7223	-1.7551
15.7328	16.0679
15.7433	25.4111
15.7538	24.157
15.7644	10.1868
15.7854	-4.66189
15.7959	-3.51514
15.8065	-1.44283
15.817	-0.659537
15.8275	1.0698
15.8485	1.65695
15.8591	0.669434
15.8696	0.661887
15.8801	-3.0256
15.8906	-6.47074
15.9117	-1.56419
15.9222	-2.86531
15.9327	-1.95984
15.9432	-0.824486
15.9538	-3.73456
15.9748	-3.33487
15.9853	11.7108
15.9959	24.3717
16.0064	22.0541
16.0169	13.5084
16.0379	-0.659023
16.0485	-3.0628
16.059	0.122314
16.0695	5.65289
16.08	-2.02681
16.1011	3.50192
16.1116	4.13747
16.1221	4.49898
16.1326	-2.47035
16.1432	6.05217
16.1642	0.349398
16.1747	-0.762129
16.1853	-0.691735
16.1958	1.80653
16.2063	0.153536
16.2274	-0.531221
16.2379	15.8666
16.2484	21.8536
16.2589	20.8915
16.2694	14.3937
16.2905	2.11291
16.301	3.28522
16.3115	-3.21982
16.322	3.24742
16.3326	1.44751
16.3536	5.29302
16.3641	-3.74861
16.3747	0.655376
16.3852	-0.833536
16.3957	-4.77407
16.4168	-2.14681
16.4273	3.38458
16.4378	-1.40829
16.4483	-2.16996
16.4588	2.60739
16.4799	2.9696
16.4904	14.9753
16.5009	21.6526
16.5115	23.8498
16.522	15.1071
16.543	-1.97007
16.5535	-2.25024
16.5641	2.48718
16.5746	4.69174
16.5851	-3.45968
16.6062	-7.80051
16.6167	-4.3553
16.6272	-3.0404
16.6377	-0.413444
16.6482	1.8494
16.6693	-0.439944
16.6798	-2.10312
16.6903	0.46057
16.7008	-2.8885
16.7114	-0.140902
16.7324	-1.92663
16.7429	20.0611
16.7535	26.4768
16.764	21.5165
16.7745	9.01822
16.7955	-1.31585
16.8061	-4.93956
16.8166	-2.19368
16.8271	-2.2169
16.8376	2.65443
16.8587	-1.28108
16.8692	-2.37401
16.8797	-4.02542
16.8902	-3.53345
16.9008	-0.199267
16.9218	-0.646033
16.9323	3.40616
16.9429	-1.88928
16.9534	3.18073
16.9639	0.772151
16.9849	-0.013921
16.9955	5.98107
17.006	20.15
17.0165	26.2505
17.027	16.2097
17.0481	0.619966
17.0586	2.28987
17.0691	-1.22439
17.0796	-1.11517
17.0902	-1.99088
17.1112	2.92702
17.1217	1.02942
17.1323	-0.703211
17.1428	-0.98616
17.1533	1.67119
17.1743	0.970317
17.1849	-2.49862
17.1954	5.15311
17.2059	0.771859
17.2164	0.0314688
17.2375	4.43629
17.248	15.0871
17.2585	23.7599
17.269	25.6336
17.2796	8.79886
17.3006	-1.92445
17.3111	-6.78778
17.3217	3.66477
17.3322	-5.70094
17.3427	2.04587
17.3637	-2.49453
17.3743	-2.93985
17.3848	-0.585678
17.3953	0.800037
17.4058	1.83816
17.4269	5.32022
17.4374	1.07692
17.4479	2.64623
17.4584	-1.79726
17.469	2.14331
17.49	0.460267
17.5005	10.6211
17.5111	23.7358
17.5216	23.8377
17.5321	12.5859
17.5532	1.20538
17.5637	-1.5282
17.5742	-2.22454
17.5847	2.24466
17.5952	-5.09475
17.6163	-1.85648
17.6268	4.66252
17.6373	-8.12972
17.6478	-2.08124
17.6584	2.06522
17.6794	-4.95592
17.6899	7.80223
17.7005	-7.77298
17.711	4.31399
17.7215	4.6767
17.7425	2.75181
17.7531	11.3466
17.7636	25.0966
17.7741	21.3296
17.7846	14.4424
17.8057	-3.36296
17.8162	-0.822444
17.8267	2.99174
17.8372	-3.34625
17.8478	-1.0939
17.8688	0.493288
17.8793	-4.02939
17.8899	3.49661
17.9004	1.02335
17.9109	-4.55132
17.9319	-0.141048
17.9425	-2.32833
17.953	-1.97465
17.9635	0.230465
17.974	-2.1312
17.9951	2.89643
18.0056	9.89592
18.0161	26.9721
18.0266	23.8926
18.0372	14.5819
18.0582	-1.62563
18.0687	-1.51737
18.0793	-3.46086
18.0898	1.73567
18.1003	2.8162
18.1213	6.36393
18.1319	3.87546
18.1424	0.750092
18.1529	-0.633545
18.1634	1.16728
18.1845	-0.0832964
18.195	4.39482
18.2055	2.83467
18.216	-2.5128
18.2266	-2.06496
18.2476	4.10595
18.2581	12.9372
18.2687	23.3281
18.2792	27.5866
18.2897	10.8481
18.3108	-0.840167
18.3213	-1.3849
18.3318	-5.89091
18.3423	2.59537
18.3528	-3.63088
18.3739	-1.70779
18.3844	-2.23385
18.3949	2.18315
18.4055	-0.205954
18.416	0.0462959
18.437	-5.04342
18.4475	-0.262574
18.4581	-4.43343
18.4686	0.922514
18.4791	1.10127
18.5002	-0.0522447
18.5107	18.1476
18.5212	25.6088
18.5317	25.8133
18.5422	12.4394
18.5633	-0.578853
18.5738	2.90066
18.5843	3.30766
18.5949	-3.90739
18.6054	3.16664
18.6264	1.54301
18.6369	2.88499
18.6475	1.39994
18.658	-3.73655
18.6685	-3.52227
18.6896	5.47925
18.7001	0.75803
18.7106	-4.25602
18.7211	1.04544
18.7316	-1.08746
18.7527	-5.53578
18.7632	5.13457
18.7737	19.2112
18.7843	24.8402
18.7948	11.8677
18.8158	-0.748226
18.8264	0.854889
18.8369	1.8052
18.8474	-6.31384
18.8579	-0.904358
18.879	-2.48623
18.8895	-3.70329
18.9	-1.64325
18.9105	-0.368985
18.921	-0.799869
18.9421	-4.36837
18.9526	-1.4509
18.9631	6.05355
18.9737	-3.16683
18.9842	-5.06635
19.0052	0.826551
19.0158	13.8037
19.0263	25.4175
19.0368	20.6615
19.0473	15.0093
19.0684	-2.35835
19.0789	-3.40804
19.0894	-1.82726
19.0999	-0.326428
19.1105	2.14442
19.1315	1.87337
19.142	-0.0675654
19.1525	2.80152
19.1631	0.244713
19.1736	2.69064
19.1946	-4.21582
19.2052	-4.72725
19.2157	2.32949
19.2262	-4.17442
19.2367	-0.905463
19.2578	-0.294603
19.2683	10.5467
19.2788	22.6622
19.2893	28.2061
19.2998	4.41561
19.3209	2.65428
19.3314	6.89241
19.3419	0.0708245
19.3525	-0.0569814
19.363	2.18129
19.384	5.49206
19.3945	-3.56771
19.4051	0.263331
19.4156	-0.559209
19.4261	1.67982
19.4472	0.478038
19.4577	1.98094
19.4682	-1.26616
19.4787	0.147154
19.4892	-2.01304
19.5103	-1.99487
19.5208	11.587
19.5313	23.5976
19.5419	20.5031
19.5524	16.7269
19.5734	-0.405658
19.5839	-4.15526
19.5945	3.30791
19.605	-2.2471
19.6155	1.52637
19.6366	-0.051102
19.6471	0.752601
19.6576	0.513577
19.6681	-1.72723
19.6786	0.122962
19.6997	6.10538
19.7102	-6.71954
19.7207	0.198069
19.7313	1.30625
19.7418	-3.15997
19.7628	-4.11516
19.7733	18.4952
19.7839	22.9084
19.7944	30.2673
19.8049	13.6209
19.826	0.228652
19.8365	1.42934
19.847	1.90692
19.8575	3.54251
19.868	1.30876
19.8891	0.434266
19.8996	0.529392
19.9101	4.0598
19.9207	2.45336
19.9312	-3.00907
19.9522	-1.9088
19.9628	0.99324
19.9733	-1.87063
19.9838	-1.13059
19.9943	-2.87063
20.0154	-0.785714
20.0259	13.2842
20.0364	27.0125
20.0469	24.0517
20.0575	18.2428
20.0785	-0.22947
20.089	9.58986
20.0995	3.00796
20.1101	1.49166
20.1206	-1.4986
20.1416	-8.48196
20.1522	-0.465861
20.1627	0.53519
20.1732	5.77313
20.1837	-4.14339
20.2048	5.72338
20.2153	-0.754488
20.2258	2.17434
20.2363	-7.62717
20.2469	0.417509
20.2679	-1.03223
20.2784	14.0613
20.2889	24.298
20.2995	20.5939
20.31	14.8558
20.331	2.08597
20.3416	1.7921
20.3521	3.02978
20.3626	3.30621
20.3731	-0.0655005
20.3942	-4.07705
20.4047	-4.15905
20.4152	4.05331
20.4257	2.13348
20.4363	0.306394
20.4573	-1.30525
20.4678	0.0947661
20.4783	0.0744571
20.4889	-1.01129
20.4994	-2.09917
20.5204	6.49945
20.531	12.6984
20.5415	22.2048
20.552	20.1139
20.5625	9.83275
20.5836	2.16134
20.5941	2.27743
20.6046	-0.655716
20.6151	0.155287
20.6257	-0.916073
20.6467	-3.32684
20.6572	3.90897
20.6677	1.11902
20.6783	7.4365
20.6888	-2.27078
20.7098	-0.413013
20.7204	2.65156
20.7309	-0.73602
20.7414	-4.16725
20.7519	-2.84946
20.773	0.302553
20.7835	13.0431
20.794	23.7399
20.8045	27.0375
20.8151	14.9933
20.8361	0.969307
20.8466	0.0807565
20.8571	-0.759436
20.8677	1.65473
20.8782	2.76164
20.8992	0.181996
20.9098	1.35135
20.9203	-0.973913
20.9308	-4.23889
20.9413	-3.00587
20.9624	2.2996
20.9729	1.34235
20.9834	4.77542
20.9939	0.168464
21.0045	2.59692
21.0255	3.97302
21.036	14.9983
21.0465	22.1966
21.0571	23.4698
21.0676	12.4017
21.0886	-2.96057
21.0992	1.42429
21.1097	3.07504
21.1202	-1.44401
21.1307	5.92359
21.1518	-0.873045
21.1623	-0.609483
21.1728	-0.715552
21.1833	-2.12696
21.1939	1.25483
21.2149	0.0601378
21.2254	4.9891
21.2359	1.82375
21.2465	1.61468
21.257	-0.665279
21.278	-4.24695
21.2886	11.7432
21.2991	21.4706
21.3096	26.8824
21.3201	11.9206
21.3412	5.00223
21.3517	2.20814
21.3622	2.50912
21.3727	0.692664
21.3832	0.626644
21.4043	1.96178
21.4148	2.77078
21.4253	-2.13384
21.4359	1.47832
21.4464	7.87113
21.4674	-0.269339
21.4779	-0.767398
21.4885	-2.07949
21.499	-4.35004
21.5095	3.57023
21.5306	0.183079
21.5411	12.9118
21.5516	29.5641
21.5621	31.5591
21.5726	9.34371
21.5937	3.16684
21.6042	1.87341
21.6147	1.19998
21.6253	1.44138
21.6358	-0.0646782
21.6568	4.77863
21.6673	1.8518
21.6779	1.04213
21.6884	3.75202
21.6989	2.69994
21.72	1.38977
21.7305	0.989655
21.741	5.28064
21.7515	1.53845
21.762	-0.261331
21.7831	-2.56561
21.7936	10.9874
21.8041	20.8802
21.8147	24.3557
21.8252	12.7923
21.8462	-6.14989
21.8567	0.0634124
21.8673	1.95769
21.8778	0.508372
21.8883	-2.8587
21.9094	3.81809
21.9199	-2.0833
21.9304	-3.68093
21.9409	-3.23776
21.9514	-0.0360018
21.9725	2.95911
21.983	3.50744
21.9935	0.636832
22.0041	-3.57779
22.0146	-1.96602
22.0356	-2.69001
22.0461	11.4819
22.0567	18.7016
22.0672	24.3626
22.0777	13.9536
22.0988	-0.443444
22.1093	1.38556
22.1198	-2.81516
22.1303	-4.36534
22.1408	-1.90996
22.1619	3.47765
22.1724	3.09581
22.1829	-1.36925
22.1934	3.6175
22.204	-0.973229
22.225	4.54256
22.2355	1.45153
22.2461	-1.35513
22.2566	2.39022
22.2671	-2.32457
22.2882	-2.80856
22.2987	7.65599
22.3092	24.8006
22.3197	23.8644
22.3302	11.7804
22.3513	-1.23079
22.3618	4.31797
22.3723	-1.27209
22.3829	-2.17241
22.3934	3.74208
22.4144	4.26812
22.4249	1.01759
22.4355	-5.22531
22.446	-1.80093
22.4565	1.84055
22.4776	0.0532238
22.4881	4.66689
22.4986	-4.10485
22.5091	2.03718
22.5196	-1.88298
22.5407	3.9731
22.5512	11.7864
22.5617	27.1191
22.5723	22.0795
22.5828	7.77928
22.6038	-3.33448
22.6143	-1.82192
22.6249	-3.07752
22.6354	3.60499
22.6459	4.02075
22.667	0.819959
22.6775	-3.10569
22.688	-0.355468
22.6985	-2.05999
22.709	4.36659
22.7301	0.948779
22.7406	1.46978
22.7511	-1.20025
22.7617	-6.04
22.7722	-2.31572
22.7932	-3.35325
22.8037	13.1239
22.8143	24.3139
22.8248	21.6167
22.8353	10.845
22.8564	4.70413
22.8669	-2.88091
22.8774	-2.75662
22.8879	-0.685713
22.8984	-2.09951
22.9195	-1.28753
22.93	1.59594
22.9405	5.20187
22.9511	-5.34383
22.9616	-0.0547878
22.9826	0.12444
22.9931	-0.252048
23.0037	-0.561895
23.0142	-1.02213
23.0247	3.01559
23.0458	-1.39681
23.0563	11.6297
23.0668	24.0237
23.0773	24.3468
23.0878	11.4989
23.1089	3.00074
23.1194	-0.0260625
23.1299	0.522705
23.1405	-0.154514
23.151	-3.01209
23.172	-2.49239
23.1825	-3.15317
23.1931	0.578524
23.2036	-2.14262
23.2141	-3.18735
23.2352	0.715033
23.2457	1.57667
23.2562	-5.28772
23.2667	5.07409
23.2772	0.0969403
23.2983	-0.315818
23.3088	15.2155
23.3193	24.2337
23.3299	22.2106
23.3404	18.6023
23.3614	-3.22641
23.3719	-0.293156
23.3825	2.54413
23.393	-3.21215
23.4035	-0.30639
23.4246	1.16086
23.4351	7.21215
23.4456	-2.68107
23.4561	-0.143128
23.4666	1.9781
23.4877	0.243379
23.4982	-3.61215
23.5087	1.22561
23.5193	0.322973
23.5298	1.33823
23.5508	3.3978
23.5613	15.0546
23.5719	25.2485
23.5824	24.9567
23.5929	8.7133
23.614	-0.403348
23.6245	0.661626
23.635	-1.20425
23.6455	0.293119
23.656	-2.47844
23.6771	4.60759
23.6876	6.4627
23.6981	-1.16981
23.7086	1.20228
23.7192	-0.703181
23.7402	3.79238
23.7507	1.3063
23.7613	0.232233
23.7718	-0.671661
23.7823	0.378761
23.8034	-3.00412
23.8139	14.0406
23.8244	21.8799
23.8349	25.6303
23.8454	12.4013
23.8665	3.28812
23.877	-0.0510295
23.8875	3.07229
23.898	-2.76983
23.9086	1.83016
23.9296	-0.672963
23.9401	0.583237
23.9507	0.215464
23.9612	2.81169
23.9717	-6.0649
23.9927	0.970215
24.0033	-4.48798
24.0138	3.62407
24.0243	-5.92415
24.0348	-3.01436
24.0559	-5.02666
24.0664	16.9346
24.0769	20.1532
24.0874	24.3661
24.098	10.403
24.119	-5.40469
24.1295	-1.01288
24.1401	1.9902
24.1506	-0.553358
24.1611	2.82607
24.1821	-1.08686
24.1927	0.020596
24.2032	-1.15555
24.2137	1.03174
24.2242	5.70244
24.2453	1.08781
24.2558	0.583908
24.2663	-1.8571
24.2768	-2.26871
24.2874	4.3966
24.3084	-3.34006
24.3189	9.26984
24.3294	23.7314
24.34	22.7438
24.3505	17.8865
24.3715	-7.1058
24.3821	1.08517
24.3926	2.14027
24.4031	-3.36485
24.4136	-1.93567
24.4347	1.29913
24.4452	4.89343
24.4557	-2.7643
24.4662	-4.74241
24.4768	2.92033
24.4978	4.57581
24.5083	-1.0061
24.5188	-6.64801
24.5294	4.35995
24.5399	-0.596187
24.5609	3.37507
24.5715	11.8814
24.582	22.896
24.5925	22.6669
24.603	16.4368
24.6241	4.30766
24.6346	-6.41997
24.6451	-2.81158
24.6556	5.33657
24.6662	-1.10298
24.6872	-4.08551
24.6977	0.0134106
24.7082	-0.325426
24.7188	-0.292327
24.7293	-1.44013
24.7503	-0.931162
24.7609	-1.36909
24.7714	1.00272
24.7819	-2.44066
24.7924	-0.869803
24.8135	-0.432654
24.824	15.9332
24.8345	25.1454
24.845	23.6946
24.8556	13.6222
24.8766	1.21957
24.8871	3.26677
24.8976	1.52106
24.9082	5.38712
24.9187	4.03789
24.9397	-0.123127
24.9503	-1.24477
24.9608	2.65032
24.9713	1.55144
24.9818	-0.283991
25.0029	-4.43529
25.0134	-5.50262
25.0239	1.04582
25.0344	2.31484
25.045	2.41272
25.066	-3.86538
25.0765	15.1272
25.087	22.4199
25.0976	25.1905
25.1081	13.2633
25.1291	-2.40987
25.1397	-1.77575
25.1502	-6.22538
25.1607	-2.75297
25.1712	-5.41304
25.1923	1.31338
25.2028	0.184435
25.2133	2.7449
25.2238	1.0707
25.2344	-1.90618
25.2554	1.03964
25.2659	-1.17245
25.2764	1.82901
[truncated: 1,190 more rows]

## Sheet: s-MOF-5
Time	Current
s	µA
0	0.00924927
0.0758245	32.3214
0.0863469	58.0892
0.096867	53.4542
0.107387	26.6566
0.128436	-7.45599
0.138956	0.452208
0.149476	10.0768
0.159996	-3.7008
0.170517	-4.66522
0.191567	3.68302
0.202089	2.68336
0.21261	0.792588
0.223132	-6.996
0.233651	-0.219939
0.254701	5.22784
0.265221	-10.1069
0.275742	-3.44072
0.286264	-14.2949
0.296785	-9.69577
0.317834	-13.8476
0.328356	28.3076
0.338877	50.6207
0.349397	62.19
0.359917	31.2538
0.380966	-1.4055
0.391486	-18.923
0.402007	-4.05032
0.412528	-0.364669
0.423048	0.851947
0.444097	-11.5048
0.454617	-3.59213
0.465137	-7.35729
0.475659	-6.08148
0.48618	7.97668
0.507229	-6.07169
0.517749	-0.244524
0.528271	6.64955
0.538792	-4.38797
0.549314	-0.839864
0.570363	0.830557
0.580885	30.5548
0.591405	50.9394
0.601926	60.7229
0.612447	40.2919
0.633496	-11.6327
0.644017	6.46152
0.654539	0.897399
0.665061	-4.82309
0.67558	15.0407
0.696629	5.73128
0.707152	-9.01721
0.717672	0.560272
0.728194	4.33601
0.738716	-1.41941
0.759765	5.13466
0.770286	-0.50013
0.780805	5.0169
0.791327	10.816
0.801847	-5.08017
0.822895	1.52736
0.833416	26.5917
0.843938	61.1073
0.854458	51.2241
0.864979	25.7195
0.886029	-1.47516
0.896548	6.75762
0.90707	8.61069
0.917591	-9.95134
0.928113	-5.97475
0.94916	4.86394
0.959681	-14.9806
0.970202	-3.48248
0.980723	-0.731481
0.991245	9.45124
1.01229	5.18349
1.02281	-6.23698
1.03333	-1.11177
1.04385	-4.49781
1.05437	-1.9487
1.07542	0.00369415
1.08594	27.7919
1.09646	6.80142
1.10699	28.2423
1.11751	59.5918
1.13856	62.8014
1.14908	-6.08663
1.1596	-3.3352
1.17012	8.76788
1.18064	4.91044
1.20169	-0.181531
1.21221	5.02542
1.22273	-2.55541
1.23325	7.91072
1.24377	-0.0405982
1.26482	4.38633
1.27535	-9.70596
1.28587	2.60662
1.29639	-12.6933
1.30691	-15.3032
1.32796	-2.2893
1.33848	23.3088
1.349	61.3839
1.35952	77.0282
1.37004	23.8216
1.39109	-4.69131
1.40161	1.54439
1.41213	3.70687
1.42265	5.28168
1.43317	3.90908
1.45422	-7.772
1.46474	-0.595348
1.47526	-1.32636
1.48579	-1.54835
1.49631	1.95368
1.51736	-6.4508
1.52788	0.265315
1.5384	-7.92846
1.54892	7.30877
1.55944	1.44922
1.58049	0.671477
1.59101	2.72812
1.60153	21.5684
1.61205	25.6314
1.62257	45.1297
1.64362	59.2586
1.65414	-16.0043
1.66466	6.36548
1.67518	-13.1285
1.68571	5.68976
1.70676	-6.35712
1.71728	5.85708
1.7278	0.984596
1.73832	-11.5551
1.74884	19.3921
1.76989	9.8399
1.78041	-0.199752
1.79093	2.00375
1.80145	4.31989
1.81197	-2.02902
1.83302	8.26005
1.84354	-9.60696
1.85406	9.45165
1.86458	-1.15855
1.87511	7.26257
1.89616	25.9933
1.90668	59.7655
1.9172	54.1857
1.92772	25.3679
1.93824	0.100185
1.95929	-5.22108
1.96981	-2.45628
1.98033	-4.21226
1.99085	0.0598429
2.00137	-2.82156
2.02242	-2.25505
2.03295	-10.3652
2.04346	-6.06651
2.05398	12.4365
2.0645	-5.04687
2.08555	-7.92552
2.09607	-4.75227
2.10659	-13.2407
2.11712	5.52576
2.12764	-0.17627
2.14869	32.6115
2.15921	70.7314
2.16973	49.2179
2.18025	28.5074
2.19077	0.537157
2.21182	-5.65648
2.22234	3.41943
2.23286	-4.05487
2.24338	-1.07446
2.2539	-8.33279
2.27495	-9.14363
2.28547	10.0416
2.29599	0.958224
2.30651	-3.74467
2.31703	-3.32412
2.33808	3.84284
2.3486	26.2559
2.35912	28.9365
2.36964	57.8807
2.38017	64.8878
2.40122	0.167079
2.41174	8.84593
2.42226	5.11662
2.43278	2.87669
2.4433	-4.23738
2.46435	-10.3907
2.47487	7.13932
2.48539	7.26652
2.49591	-1.05796
2.50643	4.07431
2.52748	5.87551
2.538	6.24951
2.54852	6.9277
2.55904	-3.4257
2.56956	11.3908
2.59061	-9.37288
2.60113	36.5543
2.61165	63.8642
2.62217	66.7189
2.6327	44.2031
2.65374	11.1612
2.66426	-8.61035
2.67479	-14.6968
2.68531	6.94859
2.69583	1.16504
2.71688	-5.84588
2.7274	-4.23133
2.73792	-6.47004
2.74844	-5.37966
2.75896	1.94962
2.78001	0.333728
2.79053	-1.84814
2.80105	0.289735
2.81157	-12.3594
2.82209	-10.8645
2.84314	-1.25304
2.85366	22.7691
2.86419	47.7934
2.87471	63.9525
2.88523	29.6135
2.90628	3.05661
2.9168	-7.43831
2.92732	-4.94781
2.93784	3.35167
2.94836	8.19114
2.96941	15.2575
2.97993	-1.42357
2.99045	1.54511
3.00097	-0.396605
3.01149	-1.1676
3.03254	-10.4721
3.04307	6.67596
3.05359	-0.672842
3.06411	-0.105487
3.07463	-10.9012
3.09568	-3.4601
3.1062	35.6631
3.11672	59.5302
3.12724	60.7598
3.13776	27.8893
3.15881	8.68098
3.16933	-0.161448
3.17985	-16.5445
3.19037	-5.20355
3.20089	-14.803
3.22195	-24.4469
3.23247	-3.98583
3.24299	10.0268
3.25351	0.354285
3.26403	4.14321
3.28508	-0.982623
3.2956	-1.10683
3.30612	-0.751338
3.31664	0.575163
3.32716	-7.07293
3.34821	8.50085
3.35873	1.18516
3.36925	3.84292
3.37977	-5.14471
3.39029	22.2341
3.41134	64.305
3.42186	61.7722
3.43238	36.1309
3.4429	-9.55677
3.45342	-1.03474
3.47447	-0.0553255
3.48499	-9.95974
3.49551	12.9472
3.50603	10.9805
3.51655	-3.48559
3.5376	0.625694
3.54812	21.9784
3.55864	58.1252
3.56916	58.8101
3.57969	39.0082
3.60074	2.51449
3.61126	5.80241
3.62178	2.84719
3.6323	-19.6508
3.64282	1.88269
3.66387	-0.461234
3.67439	-0.0417671
3.68491	11.496
3.69543	-4.1748
3.70595	-2.92805
3.727	-13.6598
3.73752	11.7978
3.74804	7.25062
3.75856	6.89359
3.76908	5.02931
3.79014	0.828185
3.80066	1.62022
3.81118	-1.89479
3.8217	-1.53083
3.83222	0.408298
3.85327	11.3671
3.86379	34.2533
3.87431	59.7108
3.88483	55.794
3.89535	25.3008
3.9164	12.0504
3.92692	-5.24353
3.93744	2.27249
3.94796	-2.53903
3.95848	2.33931
3.97953	0.393247
3.99005	-8.61512
4.00057	3.7512
4.01109	6.32945
4.02161	-0.197612
4.04266	-0.822571
4.05318	-11.9775
4.06371	-1.76991
4.07423	-6.42403
4.08475	6.65102
4.1058	-5.79398
4.11632	34.4139
4.12684	71.6123
4.13736	57.7925
4.14788	25.5521
4.16893	1.43934
4.17945	-0.0152558
4.18997	-7.4708
4.20049	3.46556
4.21101	15.1543
4.23206	-1.68238
4.24258	0.0239012
4.2531	-1.12693
4.26362	1.02029
4.27414	8.08156
4.29519	-7.18255
4.30571	2.66637
4.31624	-0.268733
4.32676	-0.0421313
4.33728	-4.35395
4.35833	1.94982
4.36885	34.236
4.37937	74.829
4.38989	58.6712
4.40041	25.6165
4.42146	-0.17467
4.43198	0.313587
4.4425	11.1214
4.45303	7.215
4.46355	-10.0834
4.4846	-6.43139
4.49512	-3.79076
4.50564	2.1975
4.51616	-1.54369
4.52668	1.61244
4.54773	2.23112
4.55825	-2.24642
4.56878	-0.30206
4.5793	1.55333
4.58982	-0.631351
4.61087	3.78587
4.62139	44.1419
4.63191	64.6013
4.64243	60.57
4.65295	17.3976
4.674	-1.12736
4.68452	-12.8572
4.69504	-0.792094
4.70556	-6.1033
4.71609	4.78828
4.73713	2.91697
4.74765	-10.6367
4.75817	-7.59424
4.76869	6.42586
4.77922	5.31004
4.80026	16.9754
4.81079	1.63106
4.82131	-5.85948
4.83183	-8.80114
4.84235	-0.421762
4.8634	-1.32927
4.87392	21.4171
4.88444	61.0252
4.89496	51.4969
4.90548	38.4369
4.92653	7.98985
4.93705	8.15602
4.94757	-3.56429
4.95809	3.86858
4.96861	-0.993004
4.98966	-2.9234
5.00018	-2.54997
5.0107	-1.43786
5.02122	-9.7723
5.03174	-10.8561
5.05279	5.97229
5.06331	-5.89571
5.07384	-13.0311
5.08436	1.31831
5.09488	11.6571
5.11593	33.0233
5.12645	57.3152
5.13697	67.8886
5.14749	1.62725
5.15801	7.53166
5.17906	-9.12317
5.18958	-6.99822
5.2001	6.05617
5.21062	3.48745
5.22114	-14.2787
5.24219	10.1332
5.25271	4.49644
5.26323	10.1003
5.27376	-2.88497
5.28428	-2.22336
5.30533	-8.4696
5.31585	19.0747
5.32637	-1.3192
5.33689	10.9363
5.34741	-4.86686
5.36846	1.23189
5.37898	17.5086
5.3895	57.2717
5.40002	67.547
5.41054	20.6636
5.43159	3.06186
5.44211	0.535623
5.45263	-7.84926
5.46316	-3.77141
5.47368	-9.69569
5.49473	-0.362229
5.50525	6.63815
5.51577	-6.22021
5.52629	-2.29013
5.53681	-7.72098
5.55786	-3.45162
5.56838	-0.372326
5.5789	-4.03116
5.58942	-11.499
5.59994	0.0263771
5.62099	-4.88689
5.63151	22.7282
5.64203	66.5672
5.65255	56.2544
5.66307	41.3406
5.68412	-5.66934
5.69464	4.41861
5.70516	-1.16528
5.71568	-0.767438
5.7262	0.39064
5.74725	7.20649
5.75777	-6.81405
5.76829	-5.86345
5.77881	2.90603
5.78933	-1.70889
5.81039	4.53542
5.82091	-0.355575
5.83143	-8.16403
5.84195	-8.29571
5.85247	-12.9465
5.87352	4.89844
5.88404	21.9437
5.89456	38.3886
5.90508	46.5687
5.9156	59.7051
5.93665	-11.462
5.94717	-8.18072
5.9577	-5.58853
5.96822	-8.49246
5.97874	2.85284
5.99978	-6.07043
6.0103	-5.42492
6.02082	4.38575
6.03135	-5.68056
6.04186	3.25399
6.06291	-7.30365
6.07343	-9.11382
6.08395	-13.8004
6.09447	13.994
6.105	-2.40796
6.12604	1.83409
6.13657	29.8417
6.14709	61.3531
6.15761	60.524
6.16813	44.4227
6.18918	-7.22794
6.1997	-10.4544
6.21022	-2.66764
6.22074	10.4596
6.23126	-7.60872
6.25231	-10.0354
6.26283	5.61626
6.27335	6.16826
6.28387	-7.81148
6.29439	-11.7102
6.31544	-21.1998
6.32596	7.9596
6.33648	-4.08839
6.347	3.82231
6.35752	-8.10469
6.37857	-2.14598
6.3891	18.7498
6.39962	52.8026
6.41014	70.5702
6.42066	36.245
6.44171	-3.02006
6.45223	-6.54265
6.46275	-14.2392
6.47327	-0.705202
6.48379	-8.43466
6.50484	-0.4983
6.51536	-2.95982
6.52588	-0.232355
6.5364	-0.631988
6.54692	-1.29078
6.56797	9.70347
6.5785	14.0356
6.58901	-1.02999
6.59954	-5.7617
6.61006	-0.488587
6.63111	-4.56858
6.64163	24.493
6.65215	59.7094
6.66267	52.306
6.67319	34.6324
6.69424	-1.78403
6.70476	-4.12602
6.71528	1.75866
6.72581	-0.0333211
6.73633	-10.2429
6.75738	-0.78132
6.7679	1.87976
6.77842	-1.37549
6.78894	-5.46808
6.79946	-7.12752
6.82051	0.504671
6.83103	-10.0967
6.84155	-4.63517
6.85207	-2.21319
6.86259	-15.6036
6.88364	0.688026
6.89416	31.2104
6.90469	58.9622
6.91521	56.96
6.92573	27.2661
6.94678	-4.3424
6.9573	-2.02782
6.96782	-9.15498
6.97834	0.689364
6.98886	-7.05365
7.00991	1.77135
7.02043	1.07683
7.03095	-1.06438
7.04148	-3.30229
7.052	4.15293
7.07305	-12.5158
7.08357	3.46206
7.09409	1.82735
7.10461	2.13065
7.11513	2.88205
7.13618	-4.91462
7.1467	28.1244
7.15722	64.9403
7.16775	63.3883
7.17827	31.6294
7.19932	-11.3859
7.20984	1.75848
7.22036	7.59151
7.23088	4.04426
7.2414	8.79301
7.26245	-11.7119
7.27297	7.0868
7.28349	-5.10718
7.29401	-19.0415
7.30453	2.83615
7.32558	-11.2193
7.3361	-9.74767
7.34662	-4.77413
7.35714	2.03753
7.36766	9.56835
7.38871	28.2592
7.39923	43.2178
7.40975	72.1356
7.42027	59.3733
7.43079	25.2432
7.45184	-9.48023
7.46236	-5.22149
7.47289	3.19818
7.48341	2.97542
7.49393	0.828859
7.51498	7.47971
7.5255	-5.80728
7.53602	-0.421628
7.54654	5.49807
7.55706	4.39207
7.57811	8.05222
7.58863	2.98512
7.59915	-2.32634
7.60967	2.72325
7.62019	-7.53831
7.64124	-12.3268
7.65176	34.4411
7.66228	59.7358
7.6728	62.4692
7.68333	17.3106
7.70437	-2.74522
7.7149	-4.5102
7.72542	-6.49784
7.73594	-16.955
7.74646	-0.111849
7.76751	5.69023
7.77803	2.86464
7.78855	-4.5184
7.79908	-2.51785
7.8096	6.74665
7.83065	-20.755
7.84117	-0.936365
7.85169	4.08421
7.86221	5.12879
7.87273	12.7874
7.89378	8.53418
7.9043	32.4253
7.91482	62.4209
7.92534	66.0673
7.93587	26.0201
7.95691	-0.302166
7.96744	1.49233
7.97796	10.0993
7.98848	-7.2681
7.999	2.39877
8.02005	-0.22792
8.03057	11.0478
8.04109	8.81383
8.05161	14.7176
8.06213	3.1975
8.08318	-1.48996
8.0937	5.91358
8.10422	7.8591
8.11474	-0.363915
8.12526	-11.3492
8.14631	-6.88058
8.15683	32.6079
8.16736	55.1978
8.17788	48.7036
8.1884	37.8833
8.20945	3.71406
8.21997	3.7081
8.23049	-3.57478
8.24101	7.73638
8.25153	-1.80421
8.27258	8.24387
8.2831	-6.85463
8.29362	-6.42207
8.30414	1.95555
8.31466	-6.93963
8.33571	0.547862
8.34624	46.9067
8.35675	56.8483
8.36728	69.2574
8.3778	25.3192
8.39885	15.0301
8.40937	6.88596
8.41989	1.53882
8.43041	-5.28069
8.44093	-2.64119
8.46198	5.07858
8.4725	0.475361
8.48302	1.64552
8.49354	11.5298
8.50406	-0.9356
8.52511	-7.34097
8.53564	0.878764
8.54616	3.39486
8.55668	-6.23421
8.5672	-12.3777
8.58825	-10.8025
8.59877	5.00323
8.60929	-5.70208
8.61981	-1.06276
8.63033	1.59819
8.65138	4.65519
8.6619	27.5571
8.67242	63.9001
8.68294	53.4582
8.69346	27.3555
8.71451	-7.70237
8.72503	8.50953
8.73555	-0.203633
8.74608	-5.5587
8.7566	-7.79854
8.77765	-2.84291
8.78817	5.26707
8.79869	-11.9973
8.80921	-2.64941
8.81973	-1.66713
8.84078	15.0399
8.8513	4.18556
8.86182	3.83798
8.87234	10.3534
8.88287	19.4694
8.90392	-1.75747
8.91444	12.8541
8.92496	14.4677
8.93548	27.3202
8.946	69.2627
8.96705	63.866
8.97757	35.1228
8.98809	4.25525
8.99861	5.14504
9.00913	-3.82122
9.03018	-15.2426
9.0407	4.79481
9.05122	-1.45946
9.06174	3.26245
9.07226	5.13127
9.09331	-2.5661
9.10383	-12.7104
9.11435	2.76597
9.12487	-5.57431
9.13539	-2.48266
9.15644	-4.54519
9.16696	27.507
9.17749	42.7856
9.18801	69.3004
9.19853	31.98
9.21958	8.35639
9.2301	14.886
9.24062	0.169873
9.25114	-13.5522
9.26166	-6.72095
9.28271	-9.07447
9.29324	-3.77349
9.30376	0.598857
9.31428	-15.054
9.3248	2.575
9.34585	-11.3561
9.35637	2.23583
9.36689	-0.823242
9.37741	-2.35813
9.38793	-0.549196
9.40898	-4.05848
9.4195	25.4701
9.43002	47.4981
9.44055	59.9276
9.45107	43.9514
9.47212	14.8909
9.48264	9.93848
9.49316	5.30678
9.50368	-5.08632
9.5142	10.8478
9.53525	-0.422012
9.54577	-0.517861
9.55629	-2.18968
9.56681	0.691443
9.57733	-3.27229
9.59838	-0.629941
9.6089	-8.15488
9.61942	-2.8095
9.62994	17.147
9.64046	-0.523263
9.66151	-1.79444
9.67203	34.078
9.68256	65.4746
9.69308	51.7762
9.7036	28.5176
9.72465	6.90433
9.73517	2.02885
9.74569	0.916948
9.75621	11.6843
9.76673	-5.09604
9.78778	0.62215
9.7983	-3.91022
9.80882	11.2053
9.81934	-14.6756
9.82986	-5.03866
9.85091	-3.97862
9.86143	4.98902
9.87195	4.55846
9.88248	10.4902
9.893	-11.8348
9.91405	5.64267
9.92457	27.8701
9.93509	55.1457
9.94561	64.2073
9.95613	23.1568
9.97718	-15.6159
9.9877	-2.7836
9.99822	-11.2614
10.0087	-4.87907
10.0193	2.79364
10.0403	2.34586
10.0508	11.9316
10.0614	-1.50116
10.0719	-11.5288
10.0824	-5.68494
10.1034	-6.91266
10.114	-9.15658
10.1245	3.27344
10.135	-4.85137
10.1455	-14.8675
10.1666	5.24002
10.1771	29.2374
10.1876	62.8334
10.1981	60.9453
10.2087	34.8245
10.2297	0.285855
10.2402	9.29476
10.2507	3.19536
10.2613	2.94788
10.2718	3.08171
10.2928	-10.9522
10.3034	-1.23786
10.3139	-1.94975
10.3244	1.5605
10.3349	-10.2157
10.356	12.2866
10.3665	0.784877
10.377	-9.10765
10.3875	-12.8488
10.3981	-2.11494
10.4191	-0.674251
10.4296	24.6745
10.4402	60.843
10.4507	55.3295
10.4612	34.223
10.4822	-5.44768
10.4928	-0.289475
10.5033	7.35969
10.5138	19.3359
10.5243	-7.57626
10.5454	-3.49254
10.5559	-6.31455
10.5664	5.89721
10.5769	-8.63233
10.5875	-3.64178
10.6085	-0.222566
10.619	-7.35849
10.6295	-7.19793
10.6401	-3.57611
10.6506	-15.7928
10.6716	-10.8683
10.6822	26.9697
10.6927	61.2649
10.7032	58.7537
10.7137	16.7371
10.7348	-3.48711
10.7453	6.00329
10.7558	4.17944
10.7663	-0.592089
10.7769	-6.67195
10.7979	4.74599
10.8084	-4.35285
10.8189	-8.79134
10.8295	-6.03148
10.84	10.8898
10.861	1.65549
10.8716	8.71614
10.8821	-3.60403
10.8926	7.05375
10.9031	-4.52259
10.9242	-1.18366
10.9347	48.7696
10.9452	65.9184
10.9557	56.3822
10.9663	29.4375
10.9873	2.45281
10.9978	9.10118
11.0083	-3.67769
11.0189	-13.0926
11.0294	-2.10257
11.0504	0.11568
11.061	0.823594
11.0715	9.89993
11.082	2.38111
11.0925	6.11216
11.1136	-8.27905
11.1241	6.52558
11.1346	15.7611
11.1451	5.81135
11.1557	1.90643
11.1767	1.15781
11.1872	43.5123
11.1978	53.1791
11.2083	59.315
11.2188	33.5354
11.2398	5.59399
11.2504	-3.28818
11.2609	2.31069
11.2714	-2.08964
11.2819	0.905798
11.303	-0.993169
11.3135	-8.58341
11.324	-0.158749
11.3345	6.59512
11.3451	-7.27081
11.3661	-1.81272
11.3766	4.99835
11.3872	-8.0441
11.3977	1.37322
11.4082	-7.9709
11.4292	8.53106
11.4398	47.4648
11.4503	75.3553
11.4608	58.5024
11.4713	35.6406
11.4924	0.909757
11.5029	0.767714
11.5134	11.6373
11.5239	-9.91864
11.5345	7.93455
11.5555	-0.368241
11.566	10.5905
11.5765	1.40777
11.5871	-5.05768
11.5976	2.08376
11.6186	5.53359
11.6292	0.2689
11.6397	3.66946
11.6502	-3.92237
11.6607	-16.0442
11.6818	6.76709
11.6923	35.332
11.7028	61.2645
11.7133	60.6647
11.7239	37.8669
11.7449	-3.43689
11.7554	-5.31229
11.7659	-1.41767
11.7765	8.94058
11.787	-10.4294
11.808	8.96113
11.8186	-4.80641
11.8291	-8.27627
11.8396	9.47415
11.8501	-0.728497
11.8712	-9.7762
11.8817	-2.69724
11.8922	7.00039
11.9027	8.96296
11.9133	-3.21127
11.9343	3.05504
11.9448	35.4442
11.9553	55.3036
11.9659	62.8198
11.9764	29.8355
11.9974	-4.03026
12.008	-3.70036
12.0185	0.504019
12.029	0.224462
12.0395	-4.2518
12.0606	-3.20259
12.0711	8.37096
12.0816	1.60772
12.0921	6.65484
12.1027	9.03626
12.1237	4.42739
12.1342	17.0743
12.1447	-6.20529
12.1553	6.07827
12.1658	-2.39206
12.1868	13.9533
12.1974	42.8605
12.2079	45.4571
12.2184	52.8657
12.2289	35.07
12.25	5.93885
12.2605	5.53808
12.271	-0.532822
12.2815	3.42196
12.2921	4.90994
12.3131	-0.585498
12.3236	7.72407
12.3341	-16.9887
12.3447	4.76536
12.3552	-7.77483
12.3762	7.2081
12.3868	-1.71943
12.3973	-6.68261
12.4078	2.81129
12.4183	-6.85213
12.4394	-6.86292
12.4499	18.291
12.4604	59.9496
12.4709	63.8859
12.4814	37.7671
12.5025	-1.06562
12.513	7.87861
12.5235	0.135045
12.5341	-0.701417
12.5446	4.3125
12.5656	7.95784
12.5762	-2.56718
12.5867	-1.83279
12.5972	-1.20926
12.6077	0.622324
12.6288	-6.76999
12.6393	7.72937
12.6498	-3.0106
12.6603	3.47702
12.6708	0.00924927
12.6919	32.3214
12.7024	58.0892
12.7129	53.4542
12.7235	26.6566
12.734	-7.45599
12.755	0.452208
12.7655	10.0768
12.7761	-3.7008
12.7866	-4.66522
12.7971	3.68302
12.8182	2.68336
12.8287	0.792588
12.8392	-6.996
12.8497	-0.219939
12.8602	5.22784
12.8813	-10.1069
12.8918	-3.44072
12.9023	-14.2949
12.9129	-9.69577
12.9234	-13.8476
12.9444	28.3076
12.955	50.6207
12.9655	62.19
12.976	31.2538
12.9865	-1.4055
13.0076	-18.923
13.0181	-4.05032
13.0286	-0.364669
13.0391	0.851947
13.0496	-11.5048
13.0707	-3.59213
13.0812	-7.35729
13.0917	-6.08148
13.1023	7.97668
13.1128	-6.07169
13.1338	-0.244524
13.1444	6.64955
13.1549	-4.38797
13.1654	-0.839864
13.1759	0.830557
13.197	30.5548
13.2075	50.9394
13.218	60.7229
13.2285	40.2919
13.239	-11.6327
13.2601	6.46152
13.2706	0.897399
13.2811	-4.82309
13.2917	15.0407
13.3022	5.73128
13.3232	-9.01721
13.3338	0.560272
13.3443	4.33601
13.3548	-1.41941
13.3653	5.13466
13.3864	-0.50013
13.3969	5.0169
13.4074	10.816
13.4179	-5.08017
13.4285	1.52736
13.4495	26.5917
13.46	61.1073
13.4705	51.2241
13.4811	25.7195
13.4916	-1.47516
13.5126	6.75762
13.5232	8.61069
13.5337	-9.95134
13.5442	-5.97475
13.5547	4.86394
13.5758	-14.9806
13.5863	-3.48248
13.5968	-0.731481
13.6073	9.45124
13.6178	5.18349
13.6389	-2.46025
13.6494	-2.77125
13.6599	-1.88117
13.6705	11.4551
13.681	-3.21823
13.702	27.7919
13.7126	62.8014
13.7231	59.2423
13.7336	28.5918
13.7441	-8.37644
13.7652	-0.0866276
13.7757	-3.3352
13.7862	8.76788
13.7967	4.91044
13.8072	-0.181531
13.8283	5.02542
13.8388	-2.55541
13.8493	7.91072
13.8599	-0.0405982
13.8704	4.38633
13.8914	-9.70596
13.9019	2.60662
13.9125	-12.6933
13.923	-15.3032
13.9335	-2.2893
13.9546	23.3088
13.9651	61.3839
13.9756	77.0282
13.9861	23.8216
13.9966	-4.69131
14.0177	1.54439
14.0282	3.70687
14.0387	-1.32636
14.0493	-1.54835
14.0598	5.28168
14.0808	3.90908
14.0913	-7.772
14.1019	-0.595348
14.1124	0.265315
14.1229	-7.92846
14.144	1.95368
14.1545	-6.4508
14.165	7.30877
14.1755	1.44922
14.186	0.671477
14.2071	25.6314
14.2176	59.2586
14.2281	45.1297
14.2387	21.5684
14.2492	2.72812
14.2702	-16.0043
14.2807	6.36548
14.2913	-13.1285
14.3018	5.68976
14.3123	-6.35712
14.3334	5.85708
14.3439	0.984596
14.3544	-11.5551
14.3649	9.3921
14.3754	10.8399
14.3965	-0.494774
14.407	-2.05952
14.4175	-1.20201
14.4281	-7.33197
14.4386	8.26005
14.4596	25.9933
14.4701	59.7655
14.4807	54.1857
14.4912	25.3679
14.5017	-9.60696
14.5228	9.45165
14.5333	-1.15855
14.5438	7.26257
14.5543	0.100185
14.5648	-5.22108
14.5859	-2.45628
14.5964	-4.21226
14.6069	0.0598429
14.6175	-2.82156
14.628	-2.25505
14.649	-10.3652
14.6595	-6.06651
14.6701	12.4365
14.6806	-5.04687
14.6911	-7.92552
14.7122	32.6115
14.7227	70.7314
14.7332	49.2179
14.7437	28.5074
14.7542	-4.75227
14.7753	-13.2407
14.7858	5.52576
14.7963	-0.17627
14.8069	0.537157
14.8174	-5.65648
14.8384	3.41943
14.8489	-4.05487
14.8595	-1.07446
14.87	-8.33279
14.8805	-9.14363
14.9016	10.0416
14.9121	-3.81282
14.9226	2.19309
14.9331	-0.254063
14.9436	-3.31688
14.9647	26.2559
14.9752	64.8878
14.9857	57.8807
14.9963	28.9365
15.0068	0.167079
15.0278	8.84593
15.0383	5.11662
15.0489	2.87669
15.0594	-4.23738
15.0699	-10.3907
15.091	7.13932
15.1015	7.26652
15.112	-1.05796
15.1225	4.07431
15.133	5.87551
15.1541	6.24951
15.1646	6.9277
15.1751	-3.4257
15.1857	11.3908
15.1962	-9.37288
15.2172	36.5543
15.2277	63.8642
15.2383	66.7189
15.2488	44.2031
15.2593	11.1612
15.2804	-8.61035
15.2909	-12.6968
15.3014	6.14202
15.3119	-7.63167
15.3224	-0.0932736
15.3435	6.31374
15.354	-12.3594
15.3645	-15.8645
15.375	1.94962
15.3856	0.333728
15.4066	-1.84814
15.4171	0.289735
15.4277	-6.47004
15.4382	-11.3797
15.4487	-1.25304
15.4698	22.7691
15.4803	47.7934
15.4908	63.9525
15.5013	29.6135
15.5118	3.05661
15.5329	-7.43831
15.5434	-4.94781
15.5539	-7.5116
15.5645	-6.66648
15.575	1.46923
15.596	-5.88703
15.6065	2.67719
15.6171	2.55456
15.6276	15.2268
15.6381	-10.4721
15.6592	6.67596
15.6697	-0.672842
15.6802	-0.105487
15.6907	-10.9012
15.7012	-3.4601
15.7223	35.6631
15.7328	59.5302
15.7433	60.7598
15.7538	27.8893
15.7644	8.68098
15.7854	-0.161448
15.7959	-16.5445
15.8065	-5.20355
15.817	-14.803
15.8275	-24.4469
15.8485	-3.98583
15.8591	10.0268
15.8696	0.354285
15.8801	-8.81613
15.8906	-7.07293
15.9117	8.50085
15.9222	1.18516
15.9327	0.360897
15.9432	-0.401968
15.9538	0.288724
15.9748	36.1309
15.9853	64.305
15.9959	61.7722
16.0064	22.2341
16.0169	3.84292
16.0379	-5.14471
16.0485	8.2244
16.059	-9.55677
16.0695	-1.03474
16.08	-0.0553255
16.1011	-9.95974
16.1116	12.9472
16.1221	10.9805
16.1326	-3.48559
16.1432	5.80241
16.1642	2.84719
16.1747	-19.6508
16.1853	1.88269
16.1958	-0.461234
16.2063	0.625694
16.2274	21.9784
16.2379	58.1252
16.2484	58.8101
16.2589	39.0082
16.2694	2.51449
16.2905	-0.0417671
16.301	11.496
16.3115	-4.1748
16.322	-2.92805
16.3326	-13.6598
16.3536	11.7978
16.3641	7.25062
16.3747	6.89359
16.3852	5.02931
16.3957	0.828185
16.4168	1.62022
16.4273	-1.89479
16.4378	-1.53083
16.4483	0.408298
16.4588	11.3671
16.4799	34.2533
16.4904	59.7108
16.5009	55.794
16.5115	25.3008
16.522	12.0504
16.543	3.80968
16.5535	0.507899
16.5641	-2.60287
16.5746	-8.33875
16.5851	-0.502718
16.6062	6.56886
16.6167	-2.95141
16.6272	-1.70859
16.6377	-1.66191
16.6482	0.824018
16.6693	-11.9775
16.6798	-1.76991
16.6903	-6.42403
16.7008	6.65102
16.7114	-5.79398
16.7324	34.4139
16.7429	71.6123
16.7535	57.7925
16.764	25.5521
16.7745	1.43934
16.7955	-0.0152558
16.8061	-7.4708
16.8166	3.46556
16.8271	15.1543
16.8376	-1.94069
16.8587	-1.52538
16.8692	-7.85663
16.8797	2.39916
16.8902	-9.37576
16.9008	-8.32279
16.9218	9.62156
16.9323	-6.80792
16.9429	8.13051
16.9534	11.4613
16.9639	1.94982
16.9849	34.236
16.9955	74.829
17.006	58.6712
17.0165	25.6165
17.027	-10.1747
17.0481	0.313587
17.0586	11.1214
17.0691	7.215
17.0796	-7.08339
17.0902	-6.43139
17.1112	-3.79076
17.1217	2.1975
17.1323	-1.54369
17.1428	1.61244
17.1533	2.23112
17.1743	-2.24642
17.1849	-0.30206
17.1954	1.55333
17.2059	-0.631351
17.2164	3.78587
17.2375	44.1419
17.248	64.6013
17.2585	60.57
17.269	17.3976
17.2796	2.91697
17.3006	-14.6367
17.3111	-10.5942
17.3217	6.42586
17.3322	5.31004
17.3427	-1.12736
17.3637	-12.8572
17.3743	-2.79209
17.3848	-5.1033
17.3953	4.78828
17.4058	16.9754
17.4269	1.63106
17.4374	-5.85948
17.4479	-8.80114
17.4584	-0.421762
17.469	-1.32927
17.49	21.4171
17.5005	61.0252
17.5111	51.4969
17.5216	38.4369
17.5321	7.98985
17.5532	8.15602
17.5637	-3.56429
17.5742	3.86858
17.5847	-0.993004
17.5952	-2.9234
17.6163	-2.54997
17.6268	-9.7723
17.6373	-10.8561
17.6478	5.97229
17.6584	-1.43786
17.6794	1.62725
17.6899	7.53166
17.7005	-13.0311
17.711	-5.89571
17.7215	1.31831
17.7425	33.0233
17.7531	57.3152
17.7636	67.8886
17.7741	31.6571
17.7846	-9.12317
17.8057	-6.99822
17.8162	6.05617
17.8267	3.48745
17.8372	-14.2787
17.8478	10.1332
17.8688	4.49644
17.8793	10.1003
17.8899	-2.88497
17.9004	-2.22336
17.9109	-8.4696
17.9319	19.0747
17.9425	-1.3192
17.953	11.9363
17.9635	-4.86686
17.974	1.23189
17.9951	17.5086
18.0056	57.2717
18.0161	67.547
18.0266	20.6636
18.0372	8.06186
18.0582	2.53562
18.0687	-7.84926
18.0793	-3.77141
18.0898	-3.45162
18.1003	-0.372326
18.1213	-4.03116
18.1319	-6.22021
18.1424	-2.29013
18.1529	-7.72098
18.1634	-9.69569
18.1845	-0.362229
18.195	6.63815
18.2055	-11.499
18.216	0.0263771
18.2266	-4.88689
18.2476	22.7282
18.2581	66.5672
18.2687	56.2544
18.2792	41.3406
18.2897	-5.86345
18.3108	2.90603
18.3213	-1.70889
18.3318	-5.66934
18.3423	4.41861
18.3528	-1.16528
18.3739	4.53542
18.3844	-0.355575
18.3949	-8.16403
18.4055	-0.767438
18.416	0.39064
18.437	7.20649
18.4475	-6.81405
18.4581	-0.295713
18.4686	-12.9465
18.4791	4.89844
18.5002	21.9437
18.5107	46.5687
18.5212	59.7051
18.5317	38.3886
18.5422	-11.462
18.5633	-8.18072
18.5738	-5.58853
18.5843	-8.49246
18.5949	2.85284
18.6054	-6.07043
18.6264	-5.42492
18.6369	4.38575
18.6475	-5.68056
18.658	3.25399
18.6685	-7.30365
18.6896	-9.11382
18.7001	-13.8004
18.7106	13.994
18.7211	-2.40796
18.7316	1.83409
18.7527	29.8417
18.7632	61.3531
18.7737	60.524
18.7843	44.4227
18.7948	-7.81148
18.8158	-11.7102
18.8264	-7.60872
18.8369	-10.0354
18.8474	5.61626
18.8579	6.16826
18.879	-7.22794
18.8895	-10.4544
18.9	-2.66764
18.9105	10.4596
18.921	-21.1998
18.9421	3.9596
18.9526	-8.08839
18.9631	7.82231
18.9737	-8.10469
18.9842	-2.14598
19.0052	18.7498
19.0158	52.8026
19.0263	70.5702
19.0368	36.245
19.0473	-3.02006
19.0684	-6.54265
19.0789	-14.2392
19.0894	-2.95982
19.0999	-0.232355
19.1105	-0.631988
19.1315	-0.705202
19.142	-8.43466
19.1525	-0.4983
19.1631	-0.290777
19.1736	9.70347
19.1946	14.0356
19.2052	-1.02999
19.2157	-5.7617
19.2262	-0.488587
19.2367	-4.56858
19.2578	24.493
19.2683	59.7094
19.2788	52.306
19.2893	34.6324
19.2998	-0.78132
19.3209	1.87976
19.3314	-1.37549
19.3419	-5.46808
19.3525	-7.12752
19.363	-1.78403
19.384	-4.12602
19.3945	1.75866
19.4051	-0.0333211
19.4156	-10.2429
19.4261	0.504671
19.4472	-10.0967
19.4577	-4.63517
19.4682	-2.21319
19.4787	-15.6036
19.4892	0.688026
19.5103	31.2104
19.5208	58.9622
19.5313	56.96
19.5419	27.2661
19.5524	-7.3424
19.5734	-2.02782
19.5839	-4.15498
19.5945	0.689364
19.605	-9.05365
19.6155	1.77135
19.6366	1.07683
19.6471	-1.06438
19.6576	-3.30229
19.6681	4.15293
19.6786	-12.5158
19.6997	3.46206
19.7102	1.82735
19.7207	2.13065
19.7313	2.88205
19.7418	-4.91462
19.7628	28.1244
19.7733	64.9403
19.7839	63.3883
19.7944	31.6294
19.8049	-11.3859
19.826	4.04426
19.8365	8.79301
19.847	7.59151
19.8575	1.75848
19.868	-11.7119
19.8891	7.0868
19.8996	-1.10718
19.9101	-19.0415
19.9207	2.83615
19.9312	-11.2193
19.9522	-9.74767
19.9628	-4.77413
19.9733	9.56835
19.9838	-2.78831
19.9943	2.03753
20.0154	43.2178
20.0259	72.1356
20.0364	59.3733
20.0469	28.2592
20.0575	-9.48023
20.0785	-5.22149
20.089	3.19818
20.0995	2.97542
20.1101	0.828859
20.1206	7.47971
20.1416	-5.80728
20.1522	-0.421628
20.1627	5.49807
20.1732	4.39207
20.1837	8.05222
20.2048	2.98512
20.2153	-2.32634
20.2258	2.72325
20.2363	-7.53831
20.2469	-12.3268
20.2679	34.4411
20.2784	59.7358
20.2889	62.4692
20.2995	17.3106
20.31	-2.74522
20.331	-4.5102
20.3416	-6.49784
20.3521	-16.955
20.3626	-2.51785
20.3731	6.74665
20.3942	2.86464
20.4047	-4.5184
20.4152	-0.111849
20.4257	5.69023
20.4363	-20.755
20.4573	-0.936365
20.4678	4.08421
20.4783	5.12879
20.4889	12.7874
20.4994	8.53418
20.5204	32.4253
20.531	62.4209
20.5415	66.0673
20.552	26.0201
20.5625	-0.302166
20.5836	6.81383
20.5941	14.7176
20.6046	-1.1975
20.6151	-0.363915
20.6257	1.49233
20.6467	10.0993
20.6572	-0.22792
20.6677	11.0478
20.6783	-7.2681
20.6888	-1.39877
20.7098	-1.48996
20.7204	5.91358
20.7309	7.8591
20.7414	-11.3492
20.7519	-6.88058
20.773	32.6079
20.7835	55.1978
20.794	48.7036
20.8045	37.8833
20.8151	3.71406
20.8361	3.7081
20.8466	-3.57478
20.8571	7.73638
20.8677	-1.80421
20.8782	8.24387
20.8992	-6.85463
20.9098	-6.42207
20.9203	1.53882
20.9308	-5.28069
20.9413	5.07858
20.9624	1.95555
20.9729	-6.93963
20.9834	0.547862
20.9939	-2.64119
21.0045	6.88596
21.0255	25.3192
21.036	56.8483
21.0465	69.2574
21.0571	46.9067
21.0676	15.0301
21.0886	0.475361
21.0992	1.64552
21.1097	11.5298
21.1202	-0.9356
21.1307	-7.34097
21.1518	0.878764
21.1623	3.39486
21.1728	-6.23421
21.1833	-12.3777
21.1939	-10.8025
21.2149	5.00323
21.2254	-5.70208
21.2359	-1.06276
21.2465	1.59819
21.257	4.65519
21.278	27.5571
21.2886	63.9001
21.2991	53.4582
21.3096	27.3555
21.3201	-7.70237
21.3412	8.50953
21.3517	-0.203633
21.3622	-5.5587
21.3727	-2.64941
21.3832	-1.66713
21.4043	5.26707
21.4148	-11.9973
21.4253	-7.79854
21.4359	-2.84291
21.4464	19.0399
21.4674	7.18556
21.4779	-0.837983
21.4885	5.35338
21.499	15.4694
21.5095	-1.75747
21.5306	27.3202
21.5411	69.2627
21.5516	63.866
21.5621	35.1228
21.5726	-3.82122
21.5937	14.4677
21.6042	12.8541
21.6147	4.25525
21.6253	5.14504
21.6358	-15.2426
21.6568	4.79481
21.6673	-1.45946
21.6779	3.26245
21.6884	5.13127
21.6989	-2.5661
21.72	-12.7104
21.7305	2.76597
21.741	-5.57431
21.7515	-2.48266
21.762	-4.54519
21.7831	27.507
21.7936	42.7856
21.8041	69.3004
21.8147	31.98
21.8252	8.35639
21.8462	14.886
21.8567	0.169873
21.8673	-13.5522
21.8778	-6.72095
21.8883	-9.07447
21.9094	-3.77349
21.9199	0.598857
21.9304	-15.054
21.9409	2.575
21.9514	-11.3561
21.9725	2.23583
21.983	-0.823242
21.9935	-2.35813
22.0041	-0.549196
22.0146	-4.05848
22.0356	25.4701
22.0461	47.4981
22.0567	59.9276
22.0672	43.9514
22.0777	14.8909
22.0988	9.93848
22.1093	5.30678
22.1198	-5.08632
22.1303	10.8478
22.1408	-0.422012
22.1619	-0.517861
22.1724	-2.18968
22.1829	0.691443
22.1934	-3.27229
22.204	-0.629941
22.225	-8.15488
22.2355	-2.8095
22.2461	17.147
22.2566	-0.523263
22.2671	-1.79444
22.2882	34.078
22.2987	65.4746
22.3092	51.7762
22.3197	28.5176
22.3302	6.90433
22.3513	2.02885
22.3618	0.916948
22.3723	11.6843
22.3829	-5.09604
22.3934	0.62215
22.4144	-3.91022
22.4249	11.2053
22.4355	-14.6756
22.446	-5.03866
22.4565	-3.97862
22.4776	4.98902
22.4881	4.55846
22.4986	10.4902
22.5091	-11.8348
22.5196	5.64267
22.5407	27.8701
22.5512	55.1457
22.5617	64.2073
22.5723	23.1568
22.5828	-15.6159
22.6038	-2.7836
22.6143	-11.2614
22.6249	-4.87907
22.6354	2.79364
22.6459	2.34586
22.667	11.9316
22.6775	-1.50116
22.688	-11.5288
22.6985	-5.68494
22.709	-6.91266
22.7301	-9.15658
22.7406	3.27344
22.7511	-4.85137
22.7617	-14.8675
22.7722	5.24002
22.7932	29.2374
22.8037	62.8334
22.8143	60.9453
22.8248	34.8245
22.8353	0.285855
22.8564	9.29476
22.8669	3.19536
22.8774	2.94788
22.8879	3.08171
22.8984	-10.9522
22.9195	-1.23786
22.93	-1.94975
22.9405	1.5605
22.9511	-10.2157
22.9616	12.2866
22.9826	0.784877
22.9931	-9.10765
23.0037	-12.8488
23.0142	-2.11494
23.0247	-0.674251
23.0458	24.6745
23.0563	60.843
23.0668	55.3295
23.0773	34.223
23.0878	-5.44768
23.1089	-0.289475
23.1194	7.35969
23.1299	19.3359
23.1405	-7.57626
23.151	-3.49254
23.172	-6.31455
23.1825	5.89721
23.1931	-8.63233
23.2036	-3.64178
23.2141	-0.222566
23.2352	-7.35849
23.2457	-7.19793
23.2562	-3.57611
23.2667	-15.7928
23.2772	-10.8683
23.2983	26.9697
23.3088	61.2649
23.3193	58.7537
23.3299	16.7371
23.3404	-3.48711
23.3614	6.00329
23.3719	4.17944
23.3825	-0.592089
23.393	-6.67195
23.4035	4.74599
23.4246	-4.35285
23.4351	-8.79134
23.4456	-6.03148
23.4561	10.8898
23.4666	1.65549
23.4877	8.71614
23.4982	-3.60403
23.5087	7.05375
23.5193	-4.52259
23.5298	-1.18366
23.5508	48.7696
23.5613	65.9184
23.5719	56.3822
23.5824	29.4375
23.5929	2.45281
23.614	9.10118
23.6245	-3.67769
23.635	-13.0926
23.6455	-2.10257
23.656	0.11568
23.6771	0.823594
23.6876	9.89993
23.6981	2.38111
23.7086	6.11216
23.7192	-8.27905
23.7402	6.52558
23.7507	15.7611
23.7613	5.81135
23.7718	1.90643
23.7823	1.15781
23.8034	43.5123
23.8139	53.1791
23.8244	59.315
23.8349	33.5354
23.8454	5.59399
23.8665	-3.28818
23.877	2.31069
23.8875	-2.08964
23.898	0.905798
23.9086	-0.993169
23.9296	-8.58341
23.9401	-0.158749
23.9507	6.59512
23.9612	-7.27081
23.9717	-1.81272
23.9927	4.99835
24.0033	-8.0441
24.0138	1.37322
24.0243	-7.9709
24.0348	8.53106
24.0559	47.4648
24.0664	75.3553
24.0769	58.5024
24.0874	35.6406
24.098	0.909757
24.119	0.767714
24.1295	11.6373
24.1401	-9.91864
24.1506	7.93455
24.1611	-0.368241
24.1821	10.5905
24.1927	1.40777
24.2032	-5.05768
24.2137	2.08376
24.2242	5.53359
24.2453	0.2689
24.2558	3.66946
24.2663	-3.92237
24.2768	-16.0442
24.2874	6.76709
24.3084	35.332
24.3189	61.2645
24.3294	60.6647
24.34	37.8669
24.3505	-3.43689
24.3715	-5.31229
24.3821	-1.41767
24.3926	8.94058
24.4031	-10.4294
24.4136	8.96113
24.4347	-4.80641
24.4452	-8.27627
24.4557	9.47415
24.4662	-0.728497
24.4768	-9.7762
24.4978	-2.69724
24.5083	7.00039
24.5188	8.96296
24.5294	-3.21127
24.5399	3.05504
24.5609	35.4442
24.5715	55.3036
24.582	62.8198
24.5925	29.8355
24.603	-4.03026
24.6241	-3.70036
24.6346	0.504019
24.6451	0.224462
24.6556	-4.2518
24.6662	-3.20259
24.6872	8.37096
24.6977	1.60772
24.7082	6.65484
24.7188	9.03626
24.7293	4.42739
24.7503	17.0743
24.7609	-6.20529
24.7714	6.07827
24.7819	-2.39206
24.7924	13.9533
24.8135	42.8605
24.824	45.4571
24.8345	52.8657
24.845	35.07
24.8556	5.93885
24.8766	5.53808
24.8871	-0.532822
24.8976	3.42196
24.9082	4.90994
24.9187	-0.585498
24.9397	7.72407
24.9503	-16.9887
24.9608	4.76536
24.9713	-7.77483
24.9818	7.2081
25.0029	-1.71943
25.0134	-6.68261
25.0239	2.81129
25.0344	-6.85213
25.045	-6.86292
25.066	18.291
25.0765	59.9496
25.087	63.8859
25.0976	37.7671
25.1081	-1.06562
25.1291	7.87861
25.1397	0.135045
25.1502	-0.701417
25.1607	4.3125
25.1712	7.95784
25.1923	-2.56718
25.2028	-1.83279
25.2133	-1.20926
25.2238	0.622324
25.2344	-6.76999
25.2554	7.72937
25.2659	-3.0106
25.2764	3.47702
[truncated: 1,190 more rows]
