# Supplementary material
Source: Royal Society of Chemistry journal article supplement (doi:10.1039/d5nr04950d)
Supplement: d5nr04950d2.xlsx [file d5nr04950d2.xlsx]

## Sheet: Time
Time	Cycles	Voltage
		V
0	0	79.5669
0.132982	1.32982	79.3301
0.265946	2.65946	80.3547
0.401808	4.01808	80.1906
0.53483	5.3483	80.297
0.732714	7.32714	80.0224
0.865683	8.65683	83.5494
0.998656	9.98656	88.0106
1.13161	11.3161	88.9894
1.2646	12.646	80.8614
1.46248	14.6248	78.074
1.5955	15.955	78.2812
1.72847	17.2847	77.5248
1.86145	18.6145	77.6388
1.99442	19.9442	78.4658
2.1923	21.923	78.7179
2.32531	23.2531	78.9287
2.45833	24.5833	78.9238
2.59129	25.9129	77.9154
2.72426	27.2426	82.4941
2.92208	29.2208	79.8074
3.0551	30.551	78.5804
3.1881	31.881	79.1548
3.32113	33.2113	77.9076
3.45411	34.5411	79.1216
3.65193	36.5193	79.5119
3.78917	37.8917	79.5156
3.92218	39.2218	79.7563
4.05519	40.5519	79.5892
4.18992	41.8992	78.9778
4.38776	43.8776	80.4288
4.52073	45.2073	80.1234
4.65375	46.5375	79.5715
4.78677	47.8677	80.2591
4.91979	49.1979	79.3742
5.1176	51.176	79.5073
5.25057	52.5057	79.4469
5.38355	53.8355	80.4922
5.51657	55.1657	80.6037
5.64959	56.4959	80.4317
5.84746	58.4746	80.611
5.98043	59.8043	80.0398
6.11338	61.1338	79.4684
6.24635	62.4635	80.064
6.37937	63.7937	79.4667
6.57725	65.7725	80.0956
6.71026	67.1026	80.1374
6.84322	68.4322	80.9597
6.97619	69.7619	79.337
7.10915	71.0915	80.0107
7.30702	73.0702	80.1948
7.44004	74.4004	80.7326
7.57707	75.7707	80.0406
7.71004	77.1004	78.9542
7.84301	78.4301	79.6427
8.04087	80.4087	79.3653
8.17387	81.7387	80.3756
8.30687	83.0687	79.7356
8.43984	84.3984	79.74
8.57282	85.7282	80.5148
8.77064	87.7064	80.2654
8.90366	89.0366	80.2906
9.03666	90.3666	80.3134
9.16966	91.6966	79.9764
9.30264	93.0264	80.3738
9.50046	95.0046	82.2023
9.63343	96.3343	78.4108
9.76645	97.6645	70.081
9.89946	98.9946	52.5545
10.0325	100.325	36.8119
10.2303	102.303	-24.691
10.3633	103.633	-42.028
10.4963	104.963	38.2559
10.6293	106.293	68.8131
10.7623	107.623	136.94
10.9601	109.601	238.378
11.0931	110.931	161.967
11.2261	112.261	109.168
11.359	113.59	88.5914
11.4921	114.921	100.292
11.6899	116.899	82.8451
11.8265	118.265	66.9704
11.9594	119.594	46.4096
12.0924	120.924	29.544
12.227	122.27	-41.9854
12.4248	124.248	6.53122
12.5578	125.578	38.0974
12.6908	126.908	109.145
12.8238	128.238	141.11
12.9567	129.567	255.35
13.1546	131.546	124.871
13.2876	132.876	79.4471
13.4206	134.206	102.468
13.5536	135.536	94.1905
13.6866	136.866	81.5742
13.8844	138.844	54.2664
14.0174	140.174	47.0183
14.1505	141.505	1.50795
14.2835	142.835	-93.125
14.4164	144.164	21.3305
14.6143	146.143	72.1364
14.7508	147.508	128.963
14.8838	148.838	255.426
15.0168	150.168	195.3
15.1524	151.524	118.219
15.3502	153.502	95.4551
15.4832	154.832	99.5734
15.6162	156.162	88.7706
15.7492	157.492	71.2914
15.8822	158.822	50.8854
16.0801	160.801	19.5594
16.213	162.13	-65.4564
16.346	163.46	-36.2618
16.479	164.79	36.9942
16.612	166.12	76.5265
16.8099	168.099	167.185
16.9429	169.429	246.989
17.0759	170.759	142.147
17.2088	172.088	99.5263
17.3419	173.419	98.5613
17.5397	175.397	93.5528
17.677	176.77	77.8724
17.81	178.1	59.9011
17.943	179.43	48.2583
18.0772	180.772	14.4775
18.2751	182.751	-83.5292
18.4081	184.081	35.3239
18.5411	185.411	52.5127
18.6741	186.741	138.678
18.807	188.07	185.661
19.0049	190.049	174.308
19.1379	191.379	112.135
19.2709	192.709	81.434
19.4039	194.039	101.131
19.5368	195.368	91.1107
19.7347	197.347	67.9414
19.8677	198.677	45.4578
20.0007	200.007	36.8638
20.1337	201.337	-23.4861
20.2667	202.667	-75.6416
20.4645	204.645	35.9776
20.5975	205.975	94.1385
20.7305	207.305	132.83
20.8635	208.635	250.638
20.9965	209.965	165.523
21.1944	211.944	86.7612
21.3273	213.273	101.199
21.4638	214.638	95.7697
21.5968	215.968	85.5827
21.7298	217.298	66.6706
21.9276	219.276	48.7567
22.0606	220.606	6.74604
22.1936	221.936	-86.2714
22.3273	223.273	-4.77671
22.4603	224.603	36.3447
22.6581	226.581	133.474
22.7911	227.911	226.813
22.9241	229.241	215.353
23.057	230.57	124.313
23.19	231.9	80.8933
23.3879	233.879	98.4617
23.5209	235.209	87.5047
23.6539	236.539	72.5828
23.7869	237.869	53.8859
23.9198	239.198	47.0846
24.1177	241.177	-45.5078
24.2507	242.507	-54.2058
24.3837	243.837	32.8777
24.5167	245.167	69.4931
24.6496	246.496	129.377
24.8493	248.493	254.321
24.9823	249.823	153.5
25.1153	251.153	105.926
25.2519	252.519	95.1695
25.3848	253.848	99.7028
25.5826	255.826	80.5169
25.7157	257.157	62.289
25.8487	258.487	45.0097
25.9817	259.817	21.9314
26.1146	261.146	-59.6861
26.3125	263.125	24.4362
26.4454	264.454	45.2953
26.5784	265.784	128.384
26.7115	267.115	166.682
26.8445	268.445	250.084
27.0423	270.423	118.071
27.1752	271.752	78.0661
27.3082	273.082	103.256
27.4412	274.412	93.7845
27.5743	275.743	78.0717
27.7721	277.721	50.0466
27.9051	279.051	43.1608
28.0381	280.381	-9.21717
28.171	281.71	-90.2849
28.304	283.04	32.0866
28.5019	285.019	76.9491
28.6349	286.349	126.109
28.7679	287.679	268.146
28.9009	289.009	182.205
29.0383	290.383	114.87
29.2361	292.361	101.267
29.3691	293.691	97.7174
29.5021	295.021	86.2104
29.6351	296.351	67.91
29.768	297.68	48.7729
29.9659	299.659	17.2792
30.0989	300.989	-76.3561
30.232	302.32	-31.3727
30.3649	303.649	32.8057
30.4979	304.979	88.5037
30.6957	306.957	189.357
30.8287	308.287	256.271
30.9617	309.617	135.12
31.0948	310.948	93.1064
31.2277	312.277	102.442
31.4256	314.256	91.01
31.5585	315.585	76.0899
31.6916	316.916	60.1049
31.8246	318.246	49.2095
31.9576	319.576	11.5411
32.1554	321.554	-74.5892
32.2884	322.884	36.4646
32.4213	324.213	63.5035
32.5543	325.543	136.768
32.6874	326.874	204.82
32.8891	328.891	165.797
33.0221	330.221	110.61
33.155	331.55	90.3727
33.288	332.88	102.289
33.421	334.21	91.0145
33.6189	336.189	67.1218
33.7519	337.519	45.8501
33.8849	338.849	30.3788
34.0178	340.178	-39.0067
34.1517	341.517	-61.2473
34.3496	343.496	36.4142
34.4826	344.826	108.268
34.6156	346.156	144.697
34.7486	347.486	256.638
34.8815	348.815	157.404
35.0794	350.794	81.8965
35.2124	352.124	105.48
35.3454	353.454	93.454
35.4784	354.784	80.271
35.6114	356.114	63.1683
35.813	358.13	46.0337
35.946	359.46	-1.13416
36.079	360.79	-96.2368
36.2126	362.126	17.0901
36.3456	363.456	39.8491
36.5434	365.434	129.066
36.6765	366.765	254.814
36.8095	368.095	198.604
36.9425	369.425	121.355
37.076	370.76	77.2865
37.2739	372.739	100.251
37.4068	374.068	87.6338
37.5398	375.398	72.7693
37.6728	376.728	52.366
37.8059	378.059	45.5708
38.0037	380.037	-62.4961
38.1367	381.367	-42.7603
38.2696	382.696	34.1131
38.4026	384.026	74.9522
38.5357	385.357	129.421
38.7335	387.335	251.096
38.8665	388.665	143.137
38.9995	389.995	101.063
39.1324	391.324	97.7623
39.2655	392.655	98.1332
39.4633	394.633	79.4607
39.5963	395.963	61.9117
39.7293	397.293	46.098
39.8623	398.623	18.0691
39.9952	399.952	-73.6178
40.1931	401.931	27.752
40.3261	403.261	47.639
40.4637	404.637	141.641
40.5967	405.967	182.834
40.7297	407.297	247.4
40.9276	409.276	115.473
41.0606	410.606	79.3122
41.1936	411.936	103.287
41.3266	413.266	91.5657
41.4595	414.595	76.6039
41.6574	416.574	47.8971
41.7904	417.904	38.3956
41.9234	419.234	-18.8152
42.0564	420.564	-81.8615
42.1894	421.894	33.047
42.3872	423.872	86.789
42.5202	425.202	131.997
42.6532	426.532	259.026
42.7862	427.862	171.643
42.9192	429.192	112.893
43.1171	431.171	101.824
43.25	432.5	97.0008
43.383	433.83	84.5629
43.516	435.16	67.1178
43.649	436.49	47.1335
43.8496	438.496	8.07686
43.9826	439.826	-83.252
44.1156	441.156	-14.2539
44.2503	442.503	35.5097
44.3833	443.833	101.801
44.5812	445.812	220.134
44.7147	447.147	225.579
44.8477	448.477	127.102
44.9807	449.807	83.7684
45.1137	451.137	104.158
45.3115	453.115	89.4895
45.4446	454.446	73.5629
45.5775	455.775	55.2746
45.7105	457.105	48.1606
45.8435	458.435	4.16803
46.0413	460.413	-61.6149
46.1744	461.744	29.6979
46.3074	463.074	69.0553
46.4404	464.404	132.736
46.5733	465.733	241.981
46.7743	467.743	156.186
46.9073	469.073	106.833
47.0403	470.403	95.0377
47.1759	471.759	100.281
47.3089	473.089	88.6069
47.5067	475.067	63.9025
47.6397	476.397	44.8513
47.7727	477.727	22.2084
47.9058	479.058	-57.1978
48.0387	480.387	-46.7596
48.2366	482.366	42.1029
48.3695	483.695	122.596
48.5026	485.026	166.303
48.6356	486.356	250.521
48.7686	487.686	146.722
48.9664	489.664	80.6811
49.0994	490.994	103.551
49.2324	492.324	93.9708
49.3654	493.654	77.2683
49.4984	494.984	62.4955
49.7006	497.006	43.2877
49.8336	498.336	-8.73337
49.9665	499.665	-91.4829
50.1014	501.014	29.4941
50.2344	502.344	49.4134
50.4322	504.322	129.005
50.5652	505.652	267.362
50.6982	506.982	180.753
50.8311	508.311	114.082
50.9642	509.642	80.4896
51.162	511.62	97.7285
51.295	512.95	86.7136
51.428	514.28	68.5205
51.561	515.61	48.2444
51.6939	516.939	39.0767
51.8918	518.918	-77.3799
52.0248	520.248	-33.9544
52.1578	521.578	34.3294
52.2908	522.908	85.023
52.4238	524.238	130.192
52.6257	526.257	261.956
52.7587	527.587	134.191
52.8917	528.917	91.6006
53.0267	530.267	103.926
53.1596	531.596	96.2602
53.3575	533.575	76.1171
53.4905	534.905	58.685
53.6235	536.235	45.3456
53.7565	537.565	8.73742
53.8895	538.895	-82.205
54.0873	540.873	32.9661
54.2203	542.203	64.9549
54.3533	543.533	133.184
54.4863	544.863	217.786
54.6193	546.193	229.27
54.8171	548.171	110.122
54.9501	549.501	91.4114
55.0831	550.831	100.993
55.2161	552.161	90.4646
55.3491	553.491	75.7361
55.547	555.47	44.3107
55.68	556.8	31.3189
55.8129	558.129	-38.3965
55.9459	559.459	-63.4102
56.0789	560.789	31.4936
56.2768	562.768	105.139
56.4098	564.098	147.183
56.5428	565.428	256.527
56.6757	566.757	157.2
56.8087	568.087	107.699
57.0066	570.066	105.2
57.1396	571.396	96.2776
57.2761	572.761	80.9989
57.4091	574.091	63.6381
57.5421	575.421	45.5657
57.7399	577.399	-3.51103
57.8729	578.729	-94.4941
58.0059	580.059	11.7197
58.1389	581.389	40.5787
58.2719	582.719	117.496
58.4697	584.697	253.379
58.6027	586.027	199.131
58.7357	587.357	122.365
58.8688	588.688	79.6724
59.0017	590.017	104.639
59.1995	591.995	88.8246
59.3325	593.325	71.877
59.4655	594.655	52.6401
59.5986	595.986	44.4981
59.7316	597.316	-5.59511
59.9294	599.294	-44.9492
60.0624	600.624	33.3859
60.1953	601.953	74.4997
60.3284	603.284	128.873
60.4614	604.614	265.558
60.6592	606.592	146.076
60.7922	607.922	103.821
60.9252	609.252	98.7512
61.0581	610.581	98.5263
61.1912	611.912	88.2949
61.3891	613.891	62.0532
61.5254	615.254	45.0409
61.6584	616.584	17.3622
61.7914	617.914	-74.4692
61.9265	619.265	-40.4344
62.1243	621.243	55.1853
62.2573	622.573	140.963
62.3903	623.903	184.591
62.5233	625.233	249.226
62.6563	626.563	137.584
62.8541	628.541	82.1558
62.9872	629.872	102.415
63.1202	631.202	91.9192
63.2531	632.531	76.5393
63.3861	633.861	59.3765
63.584	635.84	38.8018
63.717	637.17	-17.1403
63.85	638.5	-84.0342
63.983	639.83	31.244
64.116	641.16	58.9797
64.3138	643.138	131.283
64.4492	644.492	253.2
64.5822	645.822	170.158
64.7153	647.153	112.261
64.8514	648.514	89.6049
65.0492	650.492	95.8785
65.1822	651.822	84.0829
65.3152	653.152	66.2167
65.4482	654.482	45.1201
65.5812	655.812	32.6694
65.7791	657.791	-82.5472
65.912	659.12	-12.7317
66.045	660.45	35.6655
66.178	661.78	99.2854
66.311	663.11	144.904
66.5089	665.089	223.902
66.6419	666.419	127.669
66.7748	667.748	84.3055
66.9078	669.078	104.882
67.0408	670.408	96.44
67.2387	672.387	73.4321
67.3717	673.717	57.2948
67.5047	675.047	46.3004
67.6377	676.377	3.99844
67.7706	677.706	-88.8113
67.9685	679.685	29.6381
68.1015	681.015	71.5551
68.2345	682.345	134.375
68.3675	683.675	240.081
68.5005	685.005	209.353
68.6998	686.998	106.273
68.8328	688.328	95.069
68.9658	689.658	100.977
69.1009	691.009	88.5192
69.2339	692.339	72.0537
69.4317	694.317	43.9058
69.5648	695.648	24.1622
69.6978	696.978	-54.6096
69.8308	698.308	-46.8326
69.9638	699.638	29.1187
70.1616	701.616	120.012
70.2946	702.946	159.759
70.4276	704.276	250.996
70.5606	705.606	148.149
70.6936	706.936	103.601
70.8915	708.915	104.173
71.0244	710.244	94.7685
71.1574	711.574	79.2286
71.2904	712.904	62.2834
71.4234	714.234	46.7204
71.6213	716.213	-5.83969
71.7542	717.542	-93.9683
71.8872	718.872	25.8803
72.0202	720.202	47.759
72.1532	721.532	131.974
72.351	723.51	263.377
72.484	724.84	187.385
72.617	726.17	116.958
72.75	727.5	79.4333
72.883	728.83	103.806
73.0808	730.808	87.8499
73.2139	732.139	69.2707
73.3504	733.504	49.5939
73.4833	734.833	38.8773
73.6163	736.163	-13.5248
73.8142	738.142	-36.7259
73.9472	739.472	31.8849
74.0802	740.802	81.266
74.2135	742.135	125.485
74.3464	743.464	268.049
74.5443	745.443	137.006
74.6773	746.773	98.5145
74.8103	748.103	103.348
74.9433	749.433	99.1285
75.0763	750.763	85.0875
75.2741	752.741	59.4036
75.4071	754.071	46.0035
75.5401	755.401	12.6815
75.6731	756.731	-78.859
75.8061	758.061	-28.7188
76.0039	760.039	59.9526
76.1369	761.369	136.426
76.2699	762.699	196.562
76.4029	764.029	259.238
76.5359	765.359	133.754
76.738	767.38	89.9585
76.8709	768.709	102.203
77.0039	770.039	91.3232
77.1378	771.378	73.1879
77.2708	772.708	56.4047
77.4686	774.686	32.3045
77.6016	776.016	-30.0511
77.7346	777.346	-66.1896
77.8675	778.675	32.5177
78.0006	780.006	68.8125
78.1985	781.985	146.148
78.3315	783.315	254.651
78.4645	784.645	159.635
78.5974	785.974	107.775
78.7304	787.304	93.3856
78.9283	789.283	96.13
79.0613	790.613	82.1325
79.1943	791.943	64.6441
79.3273	793.273	44.7337
79.4603	794.603	28.4254
79.6581	796.581	-89.4073
79.7911	797.911	3.22186
79.9241	799.241	37.0285
80.0571	800.571	109.382
80.1901	801.901	147.956
80.3879	803.879	210.398
80.525	805.25	122.574
80.658	806.58	82.3847
80.791	807.91	105.433
80.9262	809.262	95.587
81.1241	811.241	72.1019
81.257	812.57	53.1439
81.3901	813.901	43.8101
81.5231	815.231	-4.17181
81.6561	816.561	-95.4914
81.8539	818.539	30.5437
81.9869	819.869	75.0444
82.1199	821.199	127.943
82.2529	822.529	260.712
82.3859	823.859	190.013
82.5838	825.838	102.021
82.7167	827.167	99.307
82.8497	828.497	99.1883
82.9827	829.827	88.2342
83.1157	831.157	70.3262
83.3136	833.136	43.5203
83.4466	834.466	20.3732
83.5796	835.796	-68.7947
83.7125	837.125	-40.8482
83.8455	838.455	33.9775
84.0434	840.434	134.779
84.1764	841.764	178.727
84.3094	843.094	249.004
84.4424	844.424	139.691
84.5753	845.753	100.246
84.7748	847.748	103.634
84.9078	849.078	94.4652
85.0408	850.408	77.742
85.1759	851.759	59.5663
85.3089	853.089	44.6406
85.5067	855.067	-15.2605
85.6397	856.397	-85.0586
85.7727	857.727	29.074
85.9058	859.058	56.3436
86.0388	860.388	142.542
86.2366	862.366	265.05
86.3696	863.696	174.243
86.5026	865.026	113.048
86.6356	866.356	87.6607
86.7687	867.687	102.478
86.9665	869.665	84.605
87.0995	870.995	67.9609
87.2324	872.324	46.9222
87.3655	873.655	36.9558
87.4985	874.985	-22.5332
87.7004	877.004	-22.5943
87.8334	878.334	33.2254
87.9664	879.664	95.0895
88.101	881.01	139.7
88.234	882.34	249.86
88.4318	884.318	129.835
88.5648	885.648	84.9321
88.6978	886.978	104.836
88.8307	888.307	113.275
88.9637	889.637	82.8163
89.1616	891.616	56.1447
89.2946	892.946	46.0345
89.4276	894.276	5.36075
89.5606	895.606	-88.6972
89.6935	896.935	-5.8885
89.8914	898.914	70.5035
90.0244	900.244	134.615
90.1574	901.574	236.231
90.2905	902.905	215.238
90.4235	904.235	126.273
90.6213	906.213	96.0737
90.7543	907.543	101
90.8873	908.873	89.6926
91.0203	910.203	71.8834
91.1533	911.533	53.3666
91.3511	913.511	27.2454
91.4841	914.841	-45.7392
91.6171	916.171	-54.324
91.7501	917.501	29.8336
91.8832	918.832	74.0621
92.081	920.81	151.978
92.214	922.14	254.453
92.3505	923.505	149.749
92.4835	924.835	105.72
92.6165	926.165	96.3026
92.8143	928.143	95.2863
92.9473	929.473	79.562
93.0803	930.803	62.8903
93.2137	932.137	43.1171
93.3467	933.467	22.4923
93.5446	935.446	-94.3192
93.6775	936.775	19.7033
93.8105	938.105	46.2591
93.9435	939.435	127.073
94.0765	940.765	171.255
94.2744	942.744	190.844
94.4074	944.074	118.866
94.5404	945.404	79.5285
94.6733	946.733	104.171
94.8063	948.063	94.0964
95.0042	950.042	70.3732
95.1372	951.372	50.9446
95.2702	952.702	44.2191
95.4032	954.032	-8.07155
95.5361	955.361	-88.7793
95.734	957.34	33.2041
95.867	958.67	76.7629
96	960	129.686
96.133	961.33	266.763
96.266	962.66	182.927
96.4638	964.638	100.241
96.601	966.01	102.547
96.734	967.34	99.665
96.867	968.67	86.51
97.0019	970.019	67.7771
97.1997	971.997	45.362
97.3327	973.327	13.3807
97.4657	974.657	-81.9193
97.5987	975.987	-32.0539
97.7317	977.317	31.23
97.9296	979.296	141.238
98.0625	980.625	194.873
98.1955	981.955	260.157
98.3285	983.285	134.144
98.4615	984.615	91.3344
98.6594	986.594	102.555
98.7924	987.924	92.3551
98.9254	989.254	75.8918
99.0583	990.583	57.7933
99.1914	991.914	43.2203
99.3892	993.892	-25.1292
99.526	995.26	-69.972
99.659	996.59	31.4062
99.792	997.92	68.9516
99.9271	999.271	133.033
100.125	1001.25	255.66
100.258	1002.58	159.566
100.391	1003.91	108.217
100.524	1005.24	93.9402
100.657	1006.57	102.243
100.855	1008.55	83.7455
100.988	1009.88	65.209
101.121	1011.21	44.3131
101.254	1012.54	29.1804
101.387	1013.87	-40.5157
101.585	1015.85	-1.17534
101.718	1017.18	36.7801
101.851	1018.51	106.77
101.984	1019.84	150.014
102.117	1021.17	254.64
102.315	1023.15	123.617
102.448	1024.48	81.1462
102.581	1025.81	106.357
102.714	1027.14	94.04
102.847	1028.47	80.2439
103.045	1030.45	53.8547
103.178	1031.78	44.8655
103.31	1033.1	-1.02862
103.443	1034.43	-96.7939
103.577	1035.77	11.1156
103.778	1037.78	75.3012
103.911	1039.11	131.171
104.044	1040.44	258.842
104.177	1041.77	196.686
104.31	1043.1	120.296
104.508	1045.08	98.9772
104.641	1046.41	100.194
104.774	1047.74	88.0528
104.907	1049.07	70.2089
105.04	1050.4	51.5796
105.238	1052.38	26.0873
105.371	1053.71	-65.0479
105.504	1055.04	-44.9416
105.637	1056.37	30.7867
105.77	1057.7	77.3092
105.968	1059.68	172.527
106.101	1061.01	251.44
106.234	1062.34	143.356
106.367	1063.67	102.998
106.5	1065	101.48
106.698	1066.98	94.0679
106.831	1068.31	80.7181
106.964	1069.64	61.7993
107.097	1070.97	43.0758
107.23	1072.3	18.0422
107.427	1074.27	-89.332
107.56	1075.6	28.474
107.693	1076.93	52.1381
107.826	1078.26	138.452
107.959	1079.59	183.971
108.157	1081.57	179.699
108.29	1082.9	114.775
108.423	1084.23	83.5945
108.556	1085.56	104.772
108.689	1086.89	92.5768
108.89	1088.9	69.3565
109.023	1090.23	47.5181
109.156	1091.56	39.6123
109.291	1092.91	-20.3054
109.424	1094.24	-76.0486
109.622	1096.22	32.3606
109.755	1097.55	89.8889
109.888	1098.88	135.146
110.021	1100.21	251.882
110.154	1101.54	168.535
110.351	1103.51	88.9145
110.484	1104.84	103.953
110.617	1106.17	97.2607
110.75	1107.5	85.1195
110.883	1108.83	65.1533
111.081	1110.81	42.2735
111.214	1112.14	7.68117
111.347	1113.47	-84.9327
111.48	1114.8	-18.6771
111.613	1116.13	34.246
111.811	1118.11	134.436
111.944	1119.44	216.318
112.077	1120.77	226.043
112.21	1122.1	127.876
112.343	1123.43	83.9362
112.541	1125.41	103.217
112.678	1126.78	90.1913
112.811	1128.11	73.267
112.944	1129.44	54.7932
113.078	1130.78	45.9951
113.276	1132.76	-43.8337
113.409	1134.09	-56.1129
113.542	1135.42	30.0472
113.675	1136.75	74.5016
113.808	1138.08	135.872
114.006	1140.06	254.198
114.139	1141.39	152.095
114.272	1142.72	105.947
114.405	1144.05	97.3532
114.538	1145.38	102.016
114.736	1147.36	79.9958
114.869	1148.69	63.2081
115.002	1150.02	43.7946
115.135	1151.35	24.2218
115.268	1152.68	-53.7626
115.466	1154.66	13.5373
115.599	1155.99	40.9941
115.732	1157.32	119.64
115.865	1158.65	160.362
115.998	1159.98	252.078
116.196	1161.96	122.518
116.329	1163.29	80.0566
116.462	1164.62	104.018
116.595	1165.95	94.6483
116.728	1167.28	78.6364
116.928	1169.28	50.5748
117.061	1170.61	44.821
117.194	1171.94	-8.66579
117.327	1173.27	-91.6127
117.46	1174.6	24.7501
117.658	1176.58	76.9878
117.791	1177.91	127.316
117.924	1179.24	266.104
118.057	1180.57	186.343
118.192	1181.92	116.224
118.39	1183.9	101.967
118.522	1185.22	99.583
118.656	1186.56	86.1517
118.789	1187.89	69.4577
118.922	1189.22	49.0102
119.119	1191.19	17.0456
119.252	1192.52	-75.9809
119.385	1193.85	-38.8985
119.518	1195.18	32.4683
119.651	1196.51	82.1757
119.849	1198.49	187.398
119.982	1199.82	249.886
120.115	1201.15	136.475
120.248	1202.48	96.306
120.381	1203.81	103.547
120.579	1205.79	91.7181
120.712	1207.12	78.061
120.845	1208.45	59.3018
120.978	1209.78	44.7643
121.111	1211.11	11.8658
121.309	1213.09	-81.2327
121.442	1214.42	29.9855
121.579	1215.79	65.3012
121.712	1217.12	138.906
121.845	1218.45	202.622
122.043	1220.43	168.319
122.176	1221.76	111.329
122.309	1223.09	89.8903
122.442	1224.42	102.393
122.575	1225.75	90.5916
122.772	1227.72	65.3545
122.905	1229.05	44.3473
123.038	1230.38	33.0944
123.172	1231.72	-31.3656
123.304	1233.04	-66.6166
123.502	1235.02	33.2718
123.635	1236.35	95.9424
123.768	1237.68	144.037
123.901	1239.01	254.834
124.034	1240.34	160.449
124.232	1242.32	83.5935
124.365	1243.65	106.478
124.498	1244.98	97.4654
124.631	1246.31	81.8974
124.764	1247.64	65.3158
124.966	1249.66	47.0006
125.099	1250.99	3.33685
125.232	1252.32	-93.1246
125.368	1253.68	6.45861
125.501	1255.01	38.9648
125.699	1256.99	134.327
125.832	1258.32	250.519
125.965	1259.65	201.715
126.098	1260.98	123.701
126.231	1262.31	80.5948
126.428	1264.28	99.997
126.561	1265.61	88.4337
126.694	1266.94	71.8231
126.827	1268.27	52.0515
126.96	1269.6	43.6951
127.158	1271.58	-57.0869
127.291	1272.91	-48.8889
127.424	1274.24	29.4171
127.557	1275.57	75.7513
127.69	1276.9	130.941
127.891	1278.91	253.183
128.024	1280.24	144.638
128.157	1281.57	101.332
128.293	1282.93	100.351
128.426	1284.26	99.984
128.624	1286.24	78.4507
128.757	1287.57	61.0813
128.89	1288.9	42.3131
129.023	1290.23	18.0033
129.156	1291.56	-71.4519
129.354	1293.54	27.5651
129.487	1294.87	54.8209
129.62	1296.2	137.516
129.753	1297.53	183.899
129.886	1298.86	246.744
130.083	1300.83	115.181
130.216	1302.16	85.167
130.349	1303.49	103.857
130.482	1304.82	92.776
130.615	1306.15	76.9132
130.813	1308.13	47.7127
130.946	1309.46	38.9873
131.079	1310.79	-16.31
131.212	1312.12	-85.627
131.345	1313.45	29.0778
131.543	1315.43	83.0079
131.676	1316.76	132.91
131.809	1318.09	265.218
131.942	1319.42	172.571
132.075	1320.75	113.512
132.273	1322.73	104.06
132.406	1324.06	98.4616
132.543	1325.43	84.3879
132.676	1326.76	65.7764
132.809	1328.09	45.037
133.007	1330.07	10.8612
133.14	1331.4	-84.8231
133.273	1332.73	-22.0899
133.406	1334.06	31.968
133.539	1335.39	94.9675
133.737	1337.37	210.406
133.87	1338.7	231.144
134.003	1340.03	130.373
134.136	1341.36	83.9136
134.269	1342.69	105.992
134.467	1344.67	91.5409
134.6	1346	74.0775
134.733	1347.33	56.1165
134.866	1348.66	45.9208
134.999	1349.99	5.20619
135.196	1351.96	-60.8505
135.329	1353.29	30.1951
135.462	1354.62	72.1589
135.595	1355.95	134.837
135.728	1357.28	235.611
135.926	1359.26	158.364
136.059	1360.59	106.773
136.192	1361.92	97.3793
136.325	1363.25	100.945
136.458	1364.58	90.2372
136.656	1366.56	63.6105
136.793	1367.93	43.0694
136.926	1369.26	26.4671
137.059	1370.59	-52.1858
137.195	1371.95	-47.878
137.392	1373.92	41.4817
137.525	1375.25	119.188
137.658	1376.58	161.223
137.791	1377.91	253.348
137.924	1379.24	148.415
138.122	1381.22	81.2338
138.255	1382.55	105.045
138.388	1383.88	94.4737
138.521	1385.21	79.1576
138.654	1386.54	63.4915
138.852	1388.52	43.8182
138.985	1389.85	-5.37016
139.118	1391.18	-94.5357
139.251	1392.51	19.6273
139.384	1393.84	47.4877
139.582	1395.82	127.615
139.718	1397.18	264.591
139.851	1398.51	188.204
139.984	1399.84	117.384
140.12	1401.2	81.4664
140.318	1403.18	100.041
140.451	1404.51	85.2303
140.584	1405.84	67.8773
140.717	1407.17	50.0057
140.85	1408.5	40.4821
141.047	1410.47	-75.1412
141.18	1411.8	-37.327
141.313	1413.13	33.3017
141.446	1414.46	82.7185
141.579	1415.79	130.684
141.777	1417.77	248.718
141.91	1419.1	135.048
142.043	1420.43	94.4007
142.176	1421.76	103.933
142.309	1423.09	98.7034
142.507	1425.07	77.3137
142.64	1426.4	58.5817
142.773	1427.73	44.2081
142.906	1429.06	10.9663
143.039	1430.39	-78.8206
143.237	1432.37	29.0409
143.37	1433.7	62.6202
143.503	1435.03	139.466
143.636	1436.36	197.852
143.769	1437.69	251.984
143.969	1439.69	111.012
144.102	1441.02	93.3422
144.235	1442.35	102.803
144.37	1443.7	92.1886
144.503	1445.03	73.2693
144.701	1447.01	44.6271
144.834	1448.34	31.3326
144.967	1449.67	-33.8047
145.1	1451	-66.9563
145.233	1452.33	28.8064
145.431	1454.31	97.8957
145.564	1455.64	143.151
145.697	1456.97	258.761
145.83	1458.3	160.369
145.963	1459.63	108.888
146.161	1461.61	106.383
146.294	1462.94	96.768
146.426	1464.26	82.3285
146.559	1465.59	65.6496
146.693	1466.93	43.5965
146.89	1468.9	5.54997
147.023	1470.23	-89.1893
147.156	1471.56	1.25382
147.289	1472.89	38.7618
147.422	1474.22	108.736
147.62	1476.2	241.095
147.753	1477.53	209.766
147.886	1478.86	122.929
148.019	1480.19	81.8319
148.152	1481.52	104.777
148.35	1483.5	88.3843
148.483	1484.83	71.1434
148.62	1486.2	52.3153
148.753	1487.53	44.0859
148.886	1488.86	0.034662
149.084	1490.84	-46.8398
149.217	1492.17	27.9918
149.35	1493.5	75.7151
149.484	1494.84	132.6
149.617	1496.17	257.742
149.815	1498.15	145.716
149.948	1499.48	105.391
150.081	1500.81	100.263
150.214	1502.14	100.355
150.347	1503.47	89.2825
150.544	1505.44	62.194
150.677	1506.77	42.4475
150.81	1508.1	19.8684
150.943	1509.43	-66.7442
151.076	1510.76	-42.1181
151.274	1512.74	49.7799
151.407	1514.07	131.051
151.54	1515.4	175.804
151.673	1516.73	250.447
151.806	1518.06	141.725
152.009	1520.09	84.0745
152.141	1521.41	104.133
152.274	1522.74	94.3
152.408	1524.08	77.3918
152.541	1525.41	58.2538
152.739	1527.39	40.1829
152.872	1528.72	-14.5836
153.005	1530.05	-84.8824
153.138	1531.38	30.5935
153.271	1532.71	60.4152
153.469	1534.69	132.582
153.602	1536.02	270.372
153.735	1537.35	172.822
153.868	1538.68	112.514
154.001	1540.01	90.7589
154.199	1541.99	98.8276
154.332	1543.32	85.3239
154.465	1544.65	69.6207
154.598	1545.98	45.8741
154.731	1547.31	37.0846
154.929	1549.29	-81.2915
155.062	1550.62	-27.9528
155.195	1551.95	31.5435
155.328	1553.28	90.8277
155.461	1554.61	139.409
155.659	1556.59	241.807
155.792	1557.92	132.027
155.925	1559.25	87.9693
156.058	1560.58	104.973
156.191	1561.91	95.9632
156.389	1563.89	74.7914
156.521	1565.21	56.936
156.654	1566.54	43.9799
156.787	1567.87	7.35156
156.92	1569.2	-81.6252
157.121	1571.21	29.1141
157.254	1572.54	70.4914
157.387	1573.87	132.668
157.521	1575.21	231.605
157.654	1576.54	218.162
157.852	1578.52	107.681
157.985	1579.85	96.4511
158.118	1581.18	101.622
158.251	1582.51	90.3827
158.384	1583.84	73.8922
158.582	1585.82	42.8846
158.715	1587.15	28.3106
158.848	1588.48	-44.0398
158.981	1589.81	-52.2348
159.114	1591.14	29.8679
159.312	1593.12	107.791
159.445	1594.45	152.883
159.578	1595.78	253.277
159.711	1597.11	154.865
159.844	1598.44	104.736
160.041	1600.41	105.329
160.174	1601.74	95.2676
160.307	1603.07	81.816
160.44	1604.4	63.9529
160.573	1605.73	43.4696
160.771	1607.71	-1.66813
160.904	1609.04	-96.9283
161.037	1610.37	12.8853
161.17	1611.7	42.3945
161.303	1613.03	120.441
161.501	1615.01	253.294
161.634	1616.34	195.804
161.767	1617.67	120.743
161.9	1619	81.6944
162.033	1620.33	105.317
162.235	1622.35	89.3528
162.368	1623.68	70.4748
162.501	1625.01	49.7624
162.635	1626.35	40.7573
162.768	1627.68	-8.95648
162.966	1629.66	-41.5762
163.099	1630.99	31.3445
163.232	1632.32	77.3354
163.365	1633.65	128.713
163.498	1634.98	265.695
163.696	1636.96	141.708
163.829	1638.29	102.098
163.962	1639.62	101.849
164.095	1640.95	98.6142
164.228	1642.28	86.067
164.425	1644.25	60.5271
164.558	1645.58	42.2558
164.691	1646.91	15.0318
164.824	1648.24	-75.4046
164.957	1649.57	-35.9445
165.155	1651.55	57.4008
165.288	1652.88	140.476
165.421	1654.21	189.964
165.554	1655.54	251.882
165.687	1656.87	134.798
165.885	1658.85	89.7444
166.018	1660.18	101.854
166.151	1661.51	92.3064
166.284	1662.84	75.8194
166.417	1664.17	58.8432
166.615	1666.15	38.7461
166.748	1667.48	-19.002
166.881	1668.81	-79.5924
167.014	1670.14	29.3017
167.147	1671.47	63.5415
167.349	1673.49	138.982
167.482	1674.82	252.912
167.615	1676.15	167.358
167.748	1677.48	111.165
167.881	1678.81	95.149
168.079	1680.79	97.4247
168.212	1682.12	83.4299
168.345	1683.45	66.604
168.478	1684.78	44.3476
168.611	1686.11	30.93
168.809	1688.09	-85.4321
168.942	1689.42	-14.6088
169.075	1690.75	34.2562
169.208	1692.08	98.567
169.341	1693.41	145.785
169.539	1695.39	219.78
169.672	1696.72	126.988
169.805	1698.05	82.6639
169.938	1699.38	107.346
170.071	1700.71	96.1704
170.269	1702.69	73.7078
170.402	1704.02	52.8846
170.535	1705.35	44.5555
170.668	1706.68	3.69868
170.801	1708.01	-89.3091
170.999	1709.99	29.2619
171.132	1711.32	73.256
171.265	1712.65	134.744
171.398	1713.98	244.803
171.531	1715.31	208.183
171.728	1717.28	105.997
171.861	1718.61	98.7362
171.994	1719.94	100.223
172.127	1721.27	89.4133
172.26	1722.6	71.0774
172.462	1724.62	44.2869
172.595	1725.95	24.184
172.728	1727.28	-55.2254
172.863	1728.63	-45.9397
172.996	1729.96	28.4102
173.194	1731.94	125.269
173.327	1733.27	169.844
173.46	1734.6	249.776
173.593	1735.93	143.63
173.726	1737.26	102.654
173.924	1739.24	103.93
174.057	1740.57	94.2258
174.19	1741.9	78.0147
174.323	1743.23	61.9237
174.456	1744.56	42.3631
174.654	1746.54	-8.32304
174.787	1747.87	-94.3688
174.92	1749.2	23.2652
175.053	1750.53	51.3658
175.186	1751.86	133.204
175.387	1753.87	265.003
175.52	1755.2	182.315
175.653	1756.53	115.4
175.789	1757.89	87.3786
175.922	1759.22	103.76
176.12	1761.2	87.6855
176.253	1762.53	68.2728
176.386	1763.86	47.1379
176.519	1765.19	37.7565
176.652	1766.52	-16.8601
176.85	1768.5	-33.8399
176.983	1769.83	33.6589
177.116	1771.16	84.4742
177.249	1772.49	135.121
177.382	1773.82	264.156
177.579	1775.79	133.788
177.712	1777.12	90.3929
177.845	1778.45	104.483
177.978	1779.78	97.8919
178.111	1781.11	84.7569
178.309	1783.09	57.4284
178.442	1784.42	43.9734
178.575	1785.75	10.3496
178.708	1787.08	-82.4699
178.841	1788.41	-26.1178
179.039	1790.39	65.8221
179.172	1791.72	138.512
179.305	1793.05	205.958
179.438	1794.38	231.594
179.571	1795.71	129.325
179.769	1797.69	92.437
179.902	1799.02	101.231
180.035	1800.35	89.5775
180.168	1801.68	73.741
180.301	1803.01	64.5488
180.503	1805.03	29.401
180.636	1806.36	-37.1328
180.769	1807.69	-60.5647
180.903	1809.03	27.3492
181.036	1810.36	73.5277
181.234	1812.34	149.526
181.367	1813.67	258.325
181.5	1815	155.538
181.633	1816.33	106.157
181.766	1817.66	97.3173
181.964	1819.64	96.7474
182.097	1820.97	82.5038
182.23	1822.3	64.4838
182.363	1823.63	42.261
182.496	1824.96	25.4299
182.694	1826.94	-93.0192
182.827	1828.27	7.08864
182.96	1829.6	41.6497
183.093	1830.93	112.93
183.226	1832.26	159.829
183.424	1834.24	200.943
183.557	1835.57	122.843
183.69	1836.9	82.5258
183.823	1838.23	105.714
183.956	1839.56	94.5637
184.153	1841.53	71.3816
184.286	1842.86	51.9482
184.419	1844.19	44.249
184.552	1845.52	-3.57416
184.685	1846.85	-95.0948
184.883	1848.83	28.4005
185.016	1850.16	75.1064
185.149	1851.49	132.189
185.282	1852.82	258.914
185.415	1854.15	192.056
185.616	1856.16	101.94
185.749	1857.49	101.542
185.882	1858.82	98.6917
186.018	1860.18	87.7867
186.151	1861.51	71.0469
186.348	1863.48	42.0297
186.481	1864.81	17.1695
186.614	1866.14	-72.7413
186.747	1867.47	-40.0112
186.88	1868.8	30.4837
187.078	1870.78	138.596
187.211	1872.11	193.485
187.344	1873.44	248.723
187.477	1874.77	137.953
187.61	1876.1	96.7481
187.808	1878.08	105.872
187.941	1879.41	92.3545
188.074	1880.74	76.6645
188.207	1882.07	59.06
188.34	1883.4	41.8782
188.538	1885.38	-19.3464
188.671	1886.71	-83.1765
188.804	1888.04	30.0741
188.937	1889.37	62.2655
189.07	1890.7	141.268
189.268	1892.68	266.599
189.401	1894.01	170.636
189.534	1895.34	112.805
189.667	1896.67	106.157
189.8	1898	102.3
189.997	1899.97	83.9458
190.13	1901.3	66.2501
190.264	1902.64	45.4898
190.396	1903.96	35.1376
190.529	1905.29	-25.2166
190.727	1907.27	-26.6184
190.86	1908.6	32.1679
190.993	1909.93	89.9504
191.126	1911.26	142.738
191.259	1912.59	252.07
191.457	1914.57	131.065
191.593	1915.93	83.5129
191.726	1917.26	104.165
191.859	1918.59	96.2939
191.995	1919.95	82.8035
192.193	1921.93	54.7757
192.326	1923.26	44.2
192.459	1924.59	4.36598
192.592	1925.92	-91.5202
192.725	1927.25	-6.38553
192.922	1929.22	72.6949
193.055	1930.55	133.261
193.188	1931.88	239.335
193.321	1933.21	211.727
193.454	1934.54	123.665
193.652	1936.52	97.3757
193.785	1937.85	101.414
193.918	1939.18	90.0441
194.051	1940.51	71.8857
194.184	1941.84	53.0844
194.382	1943.82	25.7864
194.515	1945.15	-45.986
194.648	1946.48	-46.342
194.781	1947.81	29.489
194.914	1949.14	75.6881
195.112	1951.12	157.004
195.245	1952.45	252.706
195.378	1953.78	152.627
195.511	1955.11	105.239
195.644	1956.44	100.964
195.845	1958.45	94.9951
195.978	1959.78	79.1983
196.111	1961.11	62.6805
196.246	1962.46	41.7136
196.379	1963.79	21.4166
196.577	1965.77	-94.1272
196.71	1967.1	19.5807
196.843	1968.43	49.7242
196.976	1969.76	130.777
197.11	1971.1	178.329
197.308	1973.08	188.812
197.441	1974.41	116.826
197.574	1975.74	81.0118
197.707	1977.07	104.103
197.84	1978.4	92.8236
198.038	1980.38	69.0477
198.171	1981.71	49.85
198.304	1983.04	40.9566
198.437	1984.37	-12.8808
198.57	1985.7	-89.0236
198.767	1987.67	30.4178
198.9	1989	78.8786
199.033	1990.33	129.125
199.166	1991.66	264.321
199.299	1992.99	179.996
199.497	1994.97	97.0683
199.63	1996.3	103.657
199.763	1997.63	99.7882
199.896	1998.96	85.7704
200.029	2000.29	67.5733
200.227	2002.27	42.1851
200.36	2003.6	13.1755
200.493	2004.93	-78.1862
200.626	2006.26	-34.5068
200.759	2007.59	34.8516
200.96	2009.6	137.756
201.093	2010.93	201.396
201.226	2012.26	254.472
201.362	2013.62	132.327
201.495	2014.95	87.5266
201.693	2016.93	103.142
201.826	2018.26	91.107
201.959	2019.59	74.2234
202.092	2020.92	56.4373
202.225	2022.25	45.3471
202.423	2024.23	-28.44
202.555	2025.55	-68.6396
202.688	2026.88	27.6945
202.822	2028.22	70.4168
202.955	2029.55	136.575
203.152	2031.52	259.416
203.285	2032.85	161.902
203.418	2034.18	108.923
203.551	2035.51	96.2825
203.684	2036.84	101.857
203.882	2038.82	82.9689
204.015	2040.15	65.9945
204.148	2041.48	44.4182
204.281	2042.81	29.4964
204.414	2044.14	-40.2816
204.612	2046.12	-19.4055
204.745	2047.45	36.5742
204.878	2048.78	104.185
205.011	2050.11	150.84
205.144	2051.44	258.55
205.342	2053.42	124.419
205.475	2054.75	81.8786
205.608	2056.08	106.059
205.741	2057.41	95.7606
205.874	2058.74	80.9854
206.075	2060.75	52.8899
206.208	2062.08	42.4424
206.341	2063.41	-2.31235
206.475	2064.75	-95.8734
206.608	2066.08	13.5905
206.806	2068.06	75.918
206.939	2069.39	132.361
207.072	2070.72	258.992
207.205	2072.05	194.923
207.34	2073.4	119.671
207.537	2075.37	101.419
207.67	2076.7	100.743
207.803	2078.03	87.9583
207.936	2079.36	69.611
208.069	2080.69	50.2883
208.267	2082.67	21.1596
208.4	2084	-67.1796
208.533	2085.33	-42.5697
208.666	2086.66	29.1931
208.799	2087.99	77.1359
208.997	2089.97	177.352
209.13	2091.3	249.831
209.263	2092.63	140.698
209.396	2093.96	101.094
209.529	2095.29	102.58
209.727	2097.27	91.4442
209.86	2098.6	77.8255
209.993	2099.93	61.2551
210.126	2101.26	43.0407
210.259	2102.59	15.9218
210.457	2104.57	-87.4698
210.59	2105.9	24.3147
210.723	2107.23	55.9379
210.856	2108.56	137.615
210.989	2109.89	188.973
211.189	2111.89	177.918
211.322	2113.22	114.061
211.455	2114.55	87.8143
211.591	2115.91	104.18
211.724	2117.24	92.1889
211.922	2119.22	67.2448
212.055	2120.55	46.1747
212.188	2121.88	37.4229
212.321	2123.21	-22.0487
212.454	2124.54	-73.1413
212.652	2126.52	32.7555
212.785	2127.85	87.7585
212.918	2129.18	139.233
213.051	2130.51	255.168
213.184	2131.84	166.699
213.382	2133.82	87.6286
213.515	2135.15	106.992
213.648	2136.48	98.8271
213.781	2137.81	83.805
213.914	2139.14	65.6951
214.111	2141.11	45.6003
214.244	2142.44	9.69708
214.377	2143.77	-84.4762
214.51	2145.1	-16.8531
214.643	2146.43	35.3134
214.841	2148.41	138.205
214.974	2149.74	223.15
215.107	2151.07	222.413
215.24	2152.4	127.944
215.373	2153.73	84.2458
215.571	2155.71	101.994
215.704	2157.04	90.0695
215.837	2158.37	73.1153
215.97	2159.7	55.0974
216.103	2161.03	46.0517
216.301	2163.01	-40.4682
216.434	2164.34	-59.6024
216.567	2165.67	24.66
216.7	2167	73.7525
216.833	2168.33	135.8
217.031	2170.31	259.398
217.166	2171.66	154.296
217.299	2172.99	105.039
217.432	2174.32	97.8705
217.568	2175.68	101.599
217.766	2177.66	80.1054
217.899	2178.99	62.7904
218.032	2180.32	42.8704
218.165	2181.65	22.9925
218.298	2182.98	-55.7825
218.496	2184.96	13.3808
218.629	2186.29	48.8958
218.762	2187.62	116.743
218.895	2188.95	166.022
219.028	2190.28	248.592
219.226	2192.26	119.935
219.359	2193.59	80.12
219.492	2194.92	104.931
219.625	2196.25	95.5772
219.758	2197.58	78.3931
219.956	2199.56	50.6707
220.089	2200.89	42.825
220.222	2202.22	-8.1491
220.355	2203.55	-90.9876
220.488	2204.88	22.3446
220.686	2206.86	76.1663
220.819	2208.19	132.276
220.952	2209.52	264.168
221.085	2210.85	187.837
221.218	2212.18	117.472
221.419	2214.19	102.893
221.552	2215.52	99.5335
221.685	2216.85	86.0385
221.82	2218.2	68.2907
221.953	2219.53	48.2172
222.151	2221.51	13.8894
222.284	2222.84	-79.2374
222.417	2224.17	-42.2219
222.55	2225.5	30.6683
222.683	2226.83	82.7985
222.881	2228.81	194.101
223.014	2230.14	251.512
223.147	2231.47	134.225
223.28	2232.8	92.0611
223.413	2234.13	103.611
223.611	2236.11	92.1774
223.744	2237.44	76.1668
223.877	2238.77	58.8875
224.01	2240.1	42.9387
224.143	2241.43	11.3258
224.341	2243.41	-74.1449
224.474	2244.74	29.4386
224.607	2246.07	68.6241
224.739	2247.39	136.919
224.872	2248.72	204.56
225.07	2250.7	168.81
225.203	2252.03	112.748
225.336	2253.36	94.6985
225.469	2254.69	101.352
225.602	2256.02	91.1307
225.8	2258	65.032
225.933	2259.33	43.8265
226.066	2260.66	32.8833
226.199	2261.99	-29.765
226.332	2263.32	-65.9796
226.534	2265.34	35.9085
226.667	2266.67	97.1065
226.8	2268	149.424
226.937	2269.37	259.646
227.07	2270.7	156.094
227.268	2272.68	83.5574
227.401	2274.01	105.153
227.534	2275.34	95.639
227.667	2276.67	80.9248
227.8	2278	64.4497
227.997	2279.97	44.9841
228.13	2281.3	2.33122
228.263	2282.63	-96.262
228.396	2283.96	3.99586
228.529	2285.29	42.3797
228.727	2287.27	135.232
228.86	2288.6	253.759
228.997	2289.97	197.598
229.13	2291.3	120.831
229.263	2292.63	80.6897
229.461	2294.61	100.622
229.594	2295.94	88.7208
229.727	2297.27	70.8044
229.861	2298.61	50.882
229.994	2299.94	43.8711
230.192	2301.92	-63.2138
230.325	2303.25	-42.8735
230.458	2304.58	30.7764
230.591	2305.91	76.0986
230.724	2307.24	129.012
230.922	2309.22	252.164
231.055	2310.55	141.907
231.188	2311.88	101.192
231.321	2313.21	102.816
231.454	2314.54	99.6875
231.652	2316.52	78.7707
231.785	2317.85	62.3947
231.918	2319.18	40.8974
232.051	2320.51	18.6715
232.184	2321.84	-73.296
232.382	2323.82	24.3109
232.515	2325.15	55.554
232.648	2326.48	136.617
232.781	2327.81	187.679
232.914	2329.14	247.727
233.111	2331.11	115.546
233.244	2332.44	88.108
233.377	2333.77	103.688
233.51	2335.1	92.8626
233.644	2336.44	77.3136
233.841	2338.41	49.0673
233.974	2339.74	39.3787
234.107	2341.07	-14.1059
234.24	2342.4	-84.2065
234.373	2343.73	25.5907
234.571	2345.71	81.0912
234.704	2347.04	132.757
234.837	2348.37	266.284
234.97	2349.7	174.43
235.103	2351.03	113.216
235.301	2353.01	103.612
235.438	2354.38	98.5714
235.571	2355.71	85.5202
235.704	2357.04	66.4625
235.838	2358.38	44.3904
236.036	2360.36	8.35662
236.169	2361.69	-85.4968
236.302	2363.02	-23.6168
236.435	2364.35	33.8512
236.568	2365.68	90.6512
236.766	2367.66	217.115
236.899	2368.99	226.161
237.032	2370.32	128.253
237.165	2371.65	83.8499
237.298	2372.98	105.95
237.496	2374.96	90.7581
237.629	2376.29	72.7286
237.762	2377.62	55.8714
237.895	2378.95	45.4991
238.028	2380.28	5.9825
238.226	2382.26	-58.4842
238.359	2383.59	29.4898
238.492	2384.92	72.7844
238.625	2386.25	135.986
238.758	2387.58	239.185
238.955	2389.55	157.594
239.088	2390.88	107.318
239.221	2392.21	98.9077
239.354	2393.54	100.751
239.487	2394.87	90.0189
239.685	2396.85	64.1
239.818	2398.18	42.6672
239.951	2399.51	27.5272
240.084	2400.84	-47.4161
240.217	2402.17	-51.6886
240.415	2404.15	40.3583
240.548	2405.48	108.406
240.681	2406.81	155.812
240.814	2408.14	255.588
240.947	2409.47	152.266
241.145	2411.45	81.0547
241.278	2412.78	105.635
241.411	2414.11	95.7551
241.544	2415.44	81.0369
241.677	2416.77	63.0228
241.877	2418.77	43.481
242.01	2420.1	-4.18174
242.143	2421.43	-96.1905
242.277	2422.77	18.0059
242.41	2424.1	49.804
242.608	2426.08	131.011
242.741	2427.41	262.821
242.874	2428.74	190.728
243.007	2430.07	117.109
243.141	2431.41	82.1822
243.339	2433.39	101.339
243.472	2434.72	87.715
243.605	2436.05	69.1571
243.738	2437.38	49.0454
243.871	2438.71	41.4346
244.068	2440.68	-70.7226
244.201	2442.01	-41.3404
244.334	2443.34	31.5007
244.467	2444.67	78.3226
244.6	2446	130.927
244.798	2447.98	248.681
244.931	2449.31	140.316
245.064	2450.64	99.4282
245.197	2451.97	103.453
245.33	2453.3	98.9938
245.528	2455.28	76.0507
245.661	2456.61	60.0554
245.794	2457.94	43.2639
245.927	2459.27	15.6972
246.06	2460.6	-76.4555
246.258	2462.58	26.4257
246.391	2463.91	59.7082
246.524	2465.24	142.97
246.657	2466.57	196.071
246.79	2467.9	251.462
246.991	2469.91	113.666
247.124	2471.24	93.3626
247.257	2472.57	103.644
247.393	2473.93	91.9438
247.525	2475.25	75.7664
247.723	2477.23	44.8205
247.856	2478.56	34.3915
247.989	2479.89	-27.1311
248.122	2481.22	-68.9468
248.255	2482.55	26.9343
248.453	2484.53	90.6837
248.586	2485.86	141.477
248.719	2487.19	252.543
248.852	2488.52	164.634
248.985	2489.85	108.813
249.183	2491.83	104.609
249.316	2493.16	97.9614
249.449	2494.49	84.0354
249.582	2495.82	65.0534
249.715	2497.15	42.3067
249.913	2499.13	4.1648
250.046	2500.46	-87.0655
250.179	2501.79	-12.0672
250.312	2503.12	38.4355
250.445	2504.45	98.9343
250.643	2506.43	234.362
250.776	2507.76	215.47
250.909	2509.09	124.484
251.042	2510.42	83.9063
251.175	2511.75	105.18
251.372	2513.72	89.8285
251.505	2515.05	72.6629
251.638	2516.38	53.958
251.771	2517.71	44.5038
251.904	2519.04	3.33752
252.102	2521.02	-51.8128
252.235	2522.35	25.2244
252.368	2523.68	74.8204
252.501	2525.01	137.183
252.634	2526.34	250.487
252.832	2528.32	156.534
252.968	2529.68	104.684
253.101	2531.01	101.615
253.234	2532.34	101.072
253.37	2533.7	88.7403
253.567	2535.67	61.7853
253.7	2537	42.006
253.833	2538.33	21.5961
253.966	2539.66	-62.6459
254.099	2540.99	-44.5873
254.297	2542.97	50.4696
254.43	2544.3	124.852
254.563	2545.63	171.196
254.696	2546.96	253.685
254.829	2548.29	143.709
255.027	2550.27	80.2932
255.16	2551.6	105.718
255.293	2552.93	94.9629
255.426	2554.26	78.9637
255.559	2555.59	59.7872
255.757	2557.57	41.9761
255.89	2558.9	-7.9928
256.023	2560.23	-90.709
256.156	2561.56	25.3596
256.289	2562.89	55.3451
256.487	2564.87	130.487
256.62	2566.2	266.175
256.753	2567.53	183.451
256.886	2568.86	114.875
257.019	2570.19	87.9005
257.22	2572.2	99.3781
257.353	2573.53	85.8595
257.486	2574.86	67.8586
257.621	2576.21	46.6089
257.754	2577.54	39.6851
257.952	2579.52	-78.9654
258.085	2580.85	-35.413
258.218	2582.18	29.7206
258.351	2583.51	85.0977
258.484	2584.84	137.635
258.682	2586.82	255.75
258.815	2588.15	133.385
258.948	2589.48	88.5081
259.081	2590.81	104.653
259.214	2592.14	97.9855
259.412	2594.12	75.3438
259.545	2595.45	58.1539
259.678	2596.78	42.5671
259.811	2598.11	8.48388
259.944	2599.44	-84.0015
260.142	2601.42	25.3393
260.275	2602.75	70.0613
260.408	2604.08	135.602
260.541	2605.41	213.089
260.674	2606.74	230.092
260.871	2608.71	109.681
261.004	2610.04	95.0187
261.137	2611.37	102.785
261.27	2612.7	91.3562
261.403	2614.03	74.287
261.601	2616.01	43.3461
261.734	2617.34	31.1447
261.867	2618.67	-36.175
262	2620	-60.2651
262.133	2621.33	28.0512
262.335	2623.35	99.5202
262.468	2624.68	150.727
262.601	2626.01	256.924
262.736	2627.36	156.486
262.869	2628.69	105.709
263.067	2630.67	105.961
263.2	2632	95.3868
263.333	2633.33	80.1848
263.466	2634.66	63.3921
263.599	2635.99	42.5185
263.797	2637.97	0.535594
263.93	2639.3	-97.5517
264.063	2640.63	8.20233
264.196	2641.96	43.0605
264.329	2643.29	115.423
264.527	2645.27	253.837
264.66	2646.6	199.405
264.793	2647.93	121.304
264.926	2649.26	85.1319
265.059	2650.59	104.129
265.257	2652.57	88.3368
265.39	2653.9	70.5248
265.523	2655.23	51.3969
265.656	2656.56	42.1936
265.789	2657.89	-5.81062
265.987	2659.87	-44.7713
266.12	2661.2	26.4937
266.253	2662.53	76.2879
266.386	2663.86	132.052
266.518	2665.18	264.504
266.716	2667.16	143.571
266.849	2668.49	101.875
266.982	2669.82	102.277
267.115	2671.15	99.7201
267.248	2672.48	88.1788
267.449	2674.49	60.9212
267.582	2675.82	40.8059
267.715	2677.15	17.8408
267.849	2678.49	-73.7057
267.982	2679.82	-38.8366
268.18	2681.8	58.4419
268.313	2683.13	135.239
268.446	2684.46	190.53
268.579	2685.79	248.278
268.713	2687.13	137.993
268.911	2689.11	91.2346
269.044	2690.44	103.891
269.177	2691.77	92.5092
269.31	2693.1	76.7366
269.443	2694.43	59.4543
269.641	2696.41	39.1386
269.774	2697.74	-17.0498
269.907	2699.07	-81.2084
270.04	2700.4	26.489
270.173	2701.73	64.0975
270.37	2703.7	138.196
270.503	2705.03	263.558
270.636	2706.36	170.502
270.769	2707.69	110.523
270.902	2709.02	95.2609
271.1	2711	97.9011
271.233	2712.33	84.4653
271.366	2713.66	67.8126
271.499	2714.99	44.8549
271.632	2716.32	35.6355
271.83	2718.3	-83.3723
271.963	2719.63	-27.5305
272.096	2720.96	30.474
272.229	2722.29	90.3879
272.362	2723.62	142.672
272.56	2725.6	233.473
272.693	2726.93	129.919
272.826	2728.26	84.8371
272.959	2729.59	105.923
273.092	2730.92	97.5913
273.29	2732.9	74.5971
273.426	2734.26	55.277
273.559	2735.59	44.4549
273.692	2736.92	4.28675
273.825	2738.25	-89.4393
274.023	2740.23	27.0568
274.156	2741.56	72.9734
274.289	2742.89	134.958
274.422	2744.22	240.782
274.555	2745.55	212.962
274.753	2747.53	107.625
274.886	2748.86	98.7092
275.019	2750.19	101.051
275.152	2751.52	89.6773
275.285	2752.85	71.2586
275.483	2754.83	40.9644
275.616	2756.16	26.416
275.749	2757.49	-48.718
275.882	2758.82	-48.3462
276.015	2760.15	25.3528
276.212	2762.12	108.751
276.345	2763.45	158.424
276.478	2764.78	252.011
276.611	2766.11	151.263
276.744	2767.44	103.803
276.942	2769.42	104.568
277.075	2770.75	94.9033
277.208	2772.08	78.4617
277.341	2773.41	62.5897
277.474	2774.74	42.2587
277.672	2776.72	-4.04136
277.805	2778.05	-97.8065
277.938	2779.38	12.6509
278.071	2780.71	46.4116
278.204	2782.04	122.969
278.402	2784.02	260.492
278.538	2785.38	189.924
278.671	2786.71	117.205
278.804	2788.04	82.2269
278.941	2789.41	104.607
279.139	2791.39	88.028
279.272	2792.72	69.8402
279.405	2794.05	46.6188
279.538	2795.38	39.6717
279.671	2796.71	-12.0231
279.868	2798.68	-39.3488
280.001	2800.01	30.7233
280.134	2801.34	78.4472
280.267	2802.67	130.365
280.4	2804	267.232
280.598	2805.98	140.395
280.731	2807.31	92.2582
280.864	2808.64	104.863
280.997	2809.97	99.1511
281.13	2811.3	85.0396
281.328	2813.28	59.5453
281.461	2814.61	42.8377
281.594	2815.94	13.2955
281.727	2817.27	-78.3144
281.86	2818.6	-35.1637
282.058	2820.58	63.8074
282.191	2821.91	143.75
282.324	2823.24	200.392
282.457	2824.57	256.757
282.59	2825.9	133.177
282.791	2827.91	95.0428
282.924	2829.24	102.756
283.057	2830.57	91.4127
283.192	2831.92	74.8009
283.325	2833.25	57.5911
283.523	2835.23	33.2143
283.656	2836.56	-29.4226
283.789	2837.89	-68.7612
283.922	2839.22	24.775
284.055	2840.55	69.553
284.252	2842.52	144.229
284.385	2843.85	258.366
284.518	2845.18	162.004
284.651	2846.51	109.347
284.784	2847.84	96.983
284.982	2849.82	97.2632
285.115	2851.15	82.9119
285.248	2852.48	65.6048
285.381	2853.81	43.9408
285.514	2855.14	29.0024
285.717	2857.17	-90.9818
285.85	2858.5	-1.49692
285.982	2859.82	40.7243
286.118	2861.18	105.798
286.251	2862.51	159.466
286.449	2864.49	204.969
286.582	2865.82	122.642
286.715	2867.15	82.8254
286.848	2868.48	105.885
286.981	2869.81	94.8682
287.179	2871.79	71.6172
287.312	2873.12	52.3977
287.445	2874.45	43.5795
287.578	2875.78	-1.43186
287.711	2877.11	-98.0047
287.909	2879.09	24.8235
288.042	2880.42	75.3067
288.175	2881.75	135.298
288.308	2883.08	257.816
288.441	2884.41	192.733
288.638	2886.38	102.949
288.771	2887.71	102.594
288.904	2889.04	100.293
289.037	2890.37	88.2691
289.17	2891.7	70.5678
289.368	2893.68	41.8654
289.501	2895.01	20.8798
289.634	2896.34	-68.0411
289.767	2897.67	-42.7218
289.9	2899	26.8867
290.098	2900.98	129.26
290.231	2902.31	177.032
290.368	2903.68	250.489
290.501	2905.01	140.449
290.634	2906.34	98.627
290.832	2908.32	104.61
290.965	2909.65	93.9686
291.098	2910.98	77.7075
291.232	2912.32	59.5232
291.365	2913.65	41.469
291.563	2915.63	-14.0843
291.695	2916.95	-85.0524
291.828	2918.28	26.3687
[truncated: 11,663 more rows]
